# Supplementary material for: A comparative characterization of the circulating miRNome in whole blood and serum of HCC patients
Source: PubMed Central journal article supplement (PMC6547851; doi:10.1038/s41598-019-44580-x), 2019-06-04
Supplement: 41598_2019_44580_MOESM1_ESM.pdf [file 41598_2019_44580_MOESM1_ESM.pdf]

# A comparative characterization of the circulating miRNome in whole blood and serum of HCC patients

Devis Pascut<sup>1\*</sup>, Helena Krmac<sup>2</sup>, Francesca Gilardi<sup>1</sup>, Riccardo Patti<sup>3,4</sup>, Raffaella Calligaris<sup>2</sup>, Lory Saveria Croce<sup>1,3,4</sup>, and Claudio Tiribelli<sup>1</sup>

1. Fondazione Italiana Fegato - ONLUS, Area Science Park, ss14, km163.5 34149, Trieste
2. Scuola Internazionale Superiore di Studi Avanzati - via Bonomea, 265 - 34136 Trieste ITALY
3. Department of Medical Sciences, University of Trieste, Trieste, Italy
4. Clinica Patologie Fegato, Azienda Sanitaria Universitaria Integrata di Trieste (ASUITS), Via Giovanni Sai 7, Trieste, Italy

## **\*Corresponding Author:**

### **Dr. Devis Pascut Ph.D.**

Liver Research Center  
Fondazione Italiana Fegato  
Bldg Q AREA Science Park - Basovizza Campus  
ss 14 km 163.5 - 34149 Trieste, Italy  
phone +39 040 375 7840  
fax +39 040 375 7832  
Email [devis.pascut@fegato.it](mailto:devis.pascut@fegato.it)

**SUPPLEMENTARY TABLES pag. 2-22**

**SUPPLEMENTARY FIGURES pag. 23-29**

SUPPLEMENTARY INFORMATION

SUPPLEMENTARY TABLES

**Table S1.** Demographic and clinical characteristics of the studied populations

|                                    | HCC            |                          | HCC      |
|------------------------------------|----------------|--------------------------|----------|
| <b>Age (median, 95%LCL-95%UCL)</b> | 68,64.97-71.45 | <b>CLIP</b>              |          |
| <b>Sex (M/F)</b>                   |                | 0                        | 8 (40%)  |
| Male                               | 17 (85%)       | 1                        | 10 (50%) |
| Female                             | 3 (15%)        | 2                        | 2 (10%)  |
| <b>Cirrhosis yes/no</b>            | 20/0           | <b>GRETCH</b>            |          |
| <b>Aetiology</b>                   |                | Low                      | 12 (60%) |
| Alcohol metabolic                  | 16 (80%)       | Intermediate             | 8 (40%)  |
| Viral                              | 4 (20%)        | <b>Number of lesions</b> |          |
| <b>Child-Pugh</b>                  |                | Single < 2cm             | 3 (15%)  |
| A                                  | 14 (70%)       | Single or 3 ≤3cm         | 11 (55%) |
| B                                  | 6 (30%)        | Large-single or multi    | 6 (30%)  |
| <b>BLCC</b>                        |                | <b>Alpha fetoprotein</b> |          |
| 0                                  | 3 (15%)        | <20 ng/mL                | 15 (75%) |
| A                                  | 12 (60%)       | 20 - 400 ng/mL           | 5 (25%)  |
| B                                  | 5 (25%)        |                          |          |

**Table S2.** Differently expressed miRNA list between Blood (B.) and Serum (S.). Gene-Level Fold Change (FC) < -2 or > 2. Gene-Level Anova P-Value < 0.05.

| miRNA transcript | B. Bi-weight Avg Sig (log2) | S. Bi-weight Avg Sig(log2) | B. SD | S. SD | FC (linear) (B vs. S) | ANOVA p-value | FDR p-value |
|------------------|-----------------------------|----------------------------|-------|-------|-----------------------|---------------|-------------|
| hsa-miR-15b-5p   | 13.72                       | 1.23                       | 0.48  | 2.7   | 5728.29               | 6.04E-22      | 2.96E-20    |
| hsa-let-7a-5p    | 13.54                       | 1.32                       | 1.04  | 2.19  | 4767.91               | 1.63E-22      | 8.51E-21    |
| hsa-let-7d-5p    | 13.64                       | 1.74                       | 0.67  | 2.93  | 3824.29               | 1.32E-18      | 4.95E-17    |
| hsa-let-7c-5p    | 14.16                       | 2.42                       | 1.04  | 3.84  | 3419.89               | 1.78E-13      | 4.30E-12    |
| hsa-miR-26a-5p   | 12.93                       | 1.34                       | 0.7   | 4.08  | 3067.99               | 5.77E-13      | 1.34E-11    |
| hsa-let-7i-5p    | 13.32                       | 2.12                       | 1.6   | 3.73  | 2354.86               | 1.21E-11      | 2.36E-10    |
| hsa-miR-181a-5p  | 12.74                       | 1.54                       | 0.83  | 2.51  | 2352.35               | 4.31E-19      | 1.69E-17    |
| hsa-miR-151a-5p  | 12.31                       | 1.37                       | 0.36  | 3.15  | 1955.05               | 1.57E-16      | 4.76E-15    |
| hsa-miR-106a-5p  | 12.77                       | 2.18                       | 1.12  | 4.65  | 1536.61               | 9.75E-08      | 1.13E-06    |
| hsa-miR-20b-5p   | 11.52                       | 1.16                       | 1.75  | 2.69  | 1312.17               | 4.70E-14      | 1.20E-12    |
| hsa-miR-20a-5p   | 11.9                        | 1.88                       | 1.98  | 4.16  | 1037.89               | 1.05E-07      | 1.19E-06    |
| hsa-miR-222-3p   | 10.78                       | 1.61                       | 0.95  | 2.9   | 576.84                | 4.09E-14      | 1.06E-12    |
| hsa-miR-126-3p   | 10.49                       | 1.34                       | 2.69  | 3.18  | 566.58                | 7.22E-08      | 8.48E-07    |
| hsa-miR-342-3p   | 10.55                       | 1.42                       | 1     | 2.46  | 561.89                | 8.77E-18      | 3.02E-16    |
| hsa-miR-150-5p   | 10.63                       | 1.63                       | 1.53  | 2.45  | 511.61                | 2.64E-16      | 7.91E-15    |
| hsa-miR-15a-5p   | 10.22                       | 1.28                       | 1.91  | 0.6   | 490.56                | 2.25E-20      | 9.53E-19    |
| hsa-miR-532-5p   | 9.99                        | 1.3                        | 0.85  | 0.74  | 413.92                | 1.58E-30      | 3.08E-28    |
| hsa-miR-320e     | 10.21                       | 1.67                       | 0.46  | 3.1   | 371.79                | 2.38E-12      | 5.12E-11    |
| hsa-miR-23b-3p   | 10.27                       | 1.87                       | 0.44  | 3.78  | 337.21                | 6.58E-09      | 8.77E-08    |
| hsa-miR-30d-5p   | 10.36                       | 2.01                       | 0.8   | 1.72  | 324.73                | 2.76E-21      | 1.26E-19    |
| hsa-miR-140-3p   | 12.77                       | 4.45                       | 0.62  | 4.48  | 318.2                 | 3.61E-09      | 5.03E-08    |
| hsa-miR-103a-3p  | 13.4                        | 5.08                       | 0.27  | 4.53  | 318.11                | 8.31E-10      | 1.25E-08    |
| hsa-miR-502-3p   | 9.44                        | 1.2                        | 0.74  | 0.98  | 301.47                | 5.01E-29      | 6.88E-27    |
| hsa-miR-4306     | 9.64                        | 1.45                       | 0.72  | 1.83  | 292.26                | 1.40E-20      | 6.13E-19    |
| hsa-miR-378a-3p  | 10.2                        | 2.07                       | 0.56  | 3.12  | 280.28                | 3.74E-11      | 6.94E-10    |
| hsa-miR-584-5p   | 9.67                        | 1.63                       | 0.71  | 1.55  | 261.97                | 1.86E-21      | 8.76E-20    |
| hsa-miR-130b-3p  | 10.11                       | 2.17                       | 0.47  | 3.24  | 245.54                | 9.80E-11      | 1.71E-09    |
| hsa-miR-574-3p   | 9.89                        | 2.1                        | 1     | 2.11  | 220.19                | 4.75E-17      | 1.51E-15    |
| hsa-miR-130a-3p  | 9.13                        | 1.39                       | 1.23  | 2.29  | 213.88                | 7.31E-15      | 2.00E-13    |
| hsa-miR-378c     | 9.21                        | 1.63                       | 0.64  | 1.41  | 191.89                | 1.47E-22      | 7.77E-21    |
| hsa-miR-107      | 13.17                       | 5.6                        | 0.33  | 4.63  | 190.07                | 7.67E-09      | 1.01E-07    |
| hsa-miR-4492     | 10.39                       | 2.85                       | 0.77  | 4.3   | 185.57                | 7.24E-07      | 7.41E-06    |
| hsa-miR-378i     | 8.74                        | 1.24                       | 0.76  | 1.34  | 181.1                 | 1.47E-22      | 7.77E-21    |
| hsa-miR-145-5p   | 8.56                        | 1.16                       | 1.05  | 2.35  | 168.35                | 6.43E-15      | 1.78E-13    |
| hsa-miR-423-5p   | 11.38                       | 4.13                       | 0.84  | 3.49  | 152.37                | 2.29E-10      | 3.77E-09    |
| hsa-miR-223-3p   | 8.78                        | 1.53                       | 1.2   | 2.51  | 152.21                | 4.51E-12      | 9.41E-11    |
| hsa-miR-378f     | 8.5                         | 1.31                       | 0.82  | 1.24  | 147.01                | 2.14E-22      | 1.08E-20    |
| hsa-miR-155-5p   | 8.23                        | 1.29                       | 0.6   | 4.56  | 122.75                | 0.0001        | 0.0007      |
| hsa-miR-18a-5p   | 8.09                        | 1.29                       | 2.08  | 1.36  | 111.79                | 1.44E-12      | 3.19E-11    |
| hsa-miR-550a-3p  | 7.79                        | 1.14                       | 1.16  | 1     | 100.64                | 1.83E-22      | 9.40E-21    |
| hsa-miR-151a-3p  | 8.67                        | 2.08                       | 0.87  | 2.89  | 96.4                  | 1.45E-10      | 2.45E-09    |
| hsa-miR-221-3p   | 8.9                         | 2.45                       | 0.96  | 4.35  | 87.13                 | 0.0004        | 0.0021      |

|                  |       |       |      |      |       |          |          |
|------------------|-------|-------|------|------|-------|----------|----------|
| hsa-miR-361-5p   | 7.96  | 1.65  | 0.79 | 1.89 | 79.39 | 1.01E-15 | 2.93E-14 |
| hsa-miR-125b-5p  | 7.58  | 1.28  | 1.52 | 0.44 | 79.25 | 2.29E-21 | 1.06E-19 |
| hsa-miR-503-5p   | 7.58  | 1.45  | 1.12 | 0.41 | 70.25 | 3.12E-24 | 1.98E-22 |
| hsa-miR-17-5p    | 12.92 | 6.86  | 1.09 | 4.91 | 66.92 | 6.00E-06 | 5.19E-05 |
| hsa-miR-1307-3p  | 7.93  | 1.91  | 0.49 | 3.39 | 64.93 | 6.99E-07 | 7.18E-06 |
| hsa-miR-181b-5p  | 7.46  | 1.45  | 0.47 | 0.7  | 64.42 | 3.30E-30 | 5.87E-28 |
| hsa-miR-197-3p   | 7.35  | 1.57  | 0.97 | 1.11 | 55.15 | 5.34E-20 | 2.17E-18 |
| hsa-miR-4530     | 12.36 | 6.69  | 0.7  | 4    | 50.99 | 2.44E-07 | 2.67E-06 |
| hsa-miR-3135b    | 7.89  | 2.56  | 0.92 | 3.7  | 40.22 | 7.85E-05 | 0.0005   |
| hsa-miR-1268b    | 8.31  | 2.99  | 0.42 | 4.37 | 39.95 | 0.0054   | 0.0159   |
| hsa-miR-106b-5p  | 10.87 | 5.56  | 0.93 | 4.05 | 39.78 | 2.17E-06 | 2.03E-05 |
| hsa-miR-30a-5p   | 6.32  | 1.32  | 0.73 | 0.92 | 32.13 | 1.99E-21 | 9.27E-20 |
| hsa-miR-92b-3p   | 10.3  | 5.32  | 0.73 | 3.2  | 31.56 | 1.04E-08 | 1.36E-07 |
| hsa-miR-4690-5p  | 7.86  | 2.89  | 0.87 | 2.96 | 31.38 | 6.98E-07 | 7.18E-06 |
| hsa-miR-574-5p   | 6.31  | 1.37  | 1.57 | 1.59 | 30.56 | 1.80E-09 | 2.61E-08 |
| hsa-miR-93-5p    | 14.06 | 9.13  | 1.19 | 5.13 | 30.43 | 7.93E-06 | 6.59E-05 |
| hsa-miR-1225-5p  | 6.86  | 1.94  | 0.79 | 3.92 | 30.21 | 0.0057   | 0.0165   |
| hsa-miR-191-5p   | 14.06 | 9.33  | 0.3  | 5.27 | 26.49 | 4.56E-07 | 4.84E-06 |
| hsa-miR-3162-5p  | 6.17  | 1.46  | 0.77 | 2.03 | 26.19 | 6.55E-10 | 1.01E-08 |
| hsa-miR-371b-5p  | 6.33  | 1.71  | 1.28 | 2.73 | 24.49 | 3.34E-05 | 0.0002   |
| hsa-miR-1910-5p  | 6.75  | 2.23  | 0.45 | 2.74 | 22.94 | 2.11E-06 | 1.98E-05 |
| hsa-miR-25-3p    | 13.26 | 8.77  | 0.3  | 5.12 | 22.41 | 2.83E-06 | 2.60E-05 |
| hsa-miR-29a-3p   | 5.62  | 1.2   | 1.19 | 1.86 | 21.39 | 5.07E-09 | 6.86E-08 |
| hsa-miR-664a-5p  | 5.53  | 1.16  | 1.24 | 0.33 | 20.75 | 5.77E-17 | 1.82E-15 |
| hsa-let-7b-5p    | 15.4  | 11.11 | 0.95 | 4.64 | 19.55 | 8.71E-07 | 8.72E-06 |
| hsa-miR-193a-5p  | 6.44  | 2.17  | 0.74 | 3.15 | 19.28 | 0.0007   | 0.0031   |
| hsa-miR-885-3p   | 5.82  | 1.6   | 1.08 | 2.58 | 18.64 | 4.10E-05 | 0.0003   |
| hsa-miR-491-5p   | 5.47  | 1.29  | 0.9  | 0.45 | 18.12 | 4.54E-21 | 2.05E-19 |
| hsa-miR-1224-5p  | 5.58  | 1.49  | 0.59 | 2.69 | 16.99 | 1.27E-05 | 0.0001   |
| hsa-miR-3141     | 7.8   | 3.86  | 0.64 | 4.18 | 15.34 | 0.0084   | 0.0226   |
| hsa-miR-1207-5p  | 9.6   | 5.76  | 0.63 | 4.02 | 14.33 | 0.0002   | 0.0011   |
| hsa-miR-4505     | 10.99 | 7.24  | 0.57 | 3.88 | 13.49 | 6.97E-05 | 0.0005   |
| hsa-miR-4800-3p  | 5.12  | 1.38  | 0.72 | 1.28 | 13.33 | 5.54E-12 | 1.13E-10 |
| hsa-miR-27a-3p   | 5.12  | 1.4   | 0.99 | 2.01 | 13.18 | 2.19E-06 | 2.05E-05 |
| hsa-miR-4539     | 5.82  | 2.17  | 0.9  | 2.11 | 12.51 | 3.15E-06 | 2.87E-05 |
| hsa-miR-409-3p   | 5.21  | 1.68  | 1.38 | 1.31 | 11.5  | 1.01E-07 | 1.17E-06 |
| hsa-miR-1909-5p  | 4.73  | 1.45  | 0.66 | 0.68 | 9.72  | 1.06E-16 | 3.24E-15 |
| hsa-miR-4443     | 10.31 | 7.09  | 0.76 | 4.14 | 9.28  | 0.0008   | 0.0035   |
| hsa-miR-629-3p   | 4.56  | 1.42  | 1.7  | 0.97 | 8.81  | 6.46E-08 | 7.66E-07 |
| has-mir-451-3p   | 12.21 | 9.14  | 0.74 | 4.7  | 8.38  | 0.0001   | 0.0008   |
| hsa-miR-885-5p   | 4.62  | 1.55  | 0.91 | 1.17 | 8.37  | 1.96E-09 | 2.82E-08 |
| hsa-miR-4741     | 9.27  | 6.25  | 0.74 | 4.93 | 8.11  | 0.0182   | 0.0411   |
| hsa-miR-1587     | 8.96  | 5.98  | 0.78 | 3.56 | 7.92  | 0.0011   | 0.0046   |
| hsa-miR-1260b    | 6.26  | 3.29  | 0.98 | 2.12 | 7.82  | 2.20E-06 | 2.05E-05 |
| hsa-miR-4708-5p  | 4.17  | 1.27  | 0.83 | 0.36 | 7.49  | 5.01E-16 | 1.47E-14 |
| hsa-miR-3679-5p  | 4.57  | 1.77  | 0.8  | 1.42 | 6.98  | 1.80E-07 | 1.99E-06 |
| hsa-miR-4514     | 3.66  | 1.02  | 0.93 | 0.29 | 6.23  | 1.30E-14 | 3.50E-13 |
| hsa-miR-4433a-3p | 8.09  | 5.45  | 0.56 | 4.03 | 6.22  | 0.0163   | 0.0377   |

|                  |       |       |      |      |        |          |          |
|------------------|-------|-------|------|------|--------|----------|----------|
| hsa-miR-4286     | 4.26  | 1.64  | 1.13 | 0.43 | 6.17   | 8.53E-12 | 1.71E-10 |
| hsa-miR-425-5p   | 12.65 | 10.13 | 0.8  | 5.19 | 5.77   | 8.09E-06 | 6.72E-05 |
| hsa-miR-486-3p   | 3.5   | 1.12  | 1.71 | 1.16 | 5.22   | 1.73E-05 | 0.0001   |
| hsa-miR-16-5p    | 13.91 | 11.57 | 0.55 | 5.68 | 5.08   | 4.26E-05 | 0.0003   |
| hsa-miR-4429     | 11.31 | 9.01  | 0.44 | 3.39 | 4.91   | 0.0003   | 0.0018   |
| hsa-miR-4454     | 9.16  | 6.9   | 2.04 | 4.56 | 4.79   | 0.0011   | 0.0046   |
| hsa-miR-4430     | 3.56  | 1.57  | 0.59 | 1.41 | 3.99   | 0.0001   | 0.0008   |
| hsa-miR-3646     | 3.59  | 1.7   | 0.64 | 1.5  | 3.72   | 0.0016   | 0.0061   |
| hsa-miR-143-3p   | 2.84  | 1.09  | 1.41 | 0.61 | 3.37   | 2.37E-05 | 0.0002   |
| hsa-miR-3935     | 3.15  | 1.54  | 0.69 | 0.73 | 3.04   | 1.16E-06 | 1.13E-05 |
| hsa-miR-486-5p   | 15.39 | 13.93 | 0.29 | 2.63 | 2.75   | 0.0009   | 0.0039   |
| hsa-miR-4481     | 3.22  | 1.76  | 0.68 | 1.08 | 2.75   | 0.0014   | 0.0054   |
| hsa-miR-1255a    | 2.59  | 1.21  | 1.32 | 0.47 | 2.6    | 0.0002   | 0.001    |
| hsa-miR-92a-3p   | 14.84 | 13.59 | 0.18 | 5.15 | 2.38   | 0.0003   | 0.0015   |
| hsa-miR-1915-5p  | 2.57  | 1.41  | 0.39 | 0.39 | 2.24   | 1.14E-11 | 2.24E-10 |
| hsa-miR-4725-5p  | 2.26  | 3.27  | 0.69 | 3.29 | -2.02  | 0.0036   | 0.0115   |
| hsa-miR-3157-3p  | 2.1   | 3.24  | 0.62 | 2.56 | -2.21  | 0.005    | 0.0151   |
| hsa-miR-2861     | 12.57 | 13.75 | 0.69 | 0.37 | -2.27  | 1.57E-07 | 1.74E-06 |
| hsa-miR-23a-3p   | 11.21 | 12.5  | 0.86 | 5.57 | -2.44  | 0.0084   | 0.0225   |
| hsa-miR-4507     | 11.15 | 12.54 | 0.77 | 1.02 | -2.63  | 0.0007   | 0.0033   |
| hsa-miR-4466     | 12.39 | 13.96 | 0.66 | 0.28 | -2.97  | 3.50E-12 | 7.36E-11 |
| hsa-miR-638      | 12.44 | 14.03 | 0.68 | 0.25 | -3.01  | 4.81E-12 | 9.90E-11 |
| hsa-miR-3656     | 11.91 | 13.53 | 0.68 | 0.62 | -3.09  | 5.02E-09 | 6.80E-08 |
| hsa-miR-548ac    | 1.9   | 3.57  | 0.74 | 2.7  | -3.19  | 0.0001   | 0.0008   |
| hsa-miR-3196     | 11.68 | 13.51 | 0.63 | 0.99 | -3.55  | 1.50E-06 | 1.43E-05 |
| hsa-miR-4763-3p  | 11.24 | 13.25 | 0.76 | 0.66 | -4.05  | 2.37E-10 | 3.87E-09 |
| hsa-miR-4310     | 2.45  | 4.48  | 0.46 | 3.08 | -4.08  | 0.0004   | 0.0021   |
| hsa-miR-762      | 11.52 | 13.55 | 0.65 | 0.64 | -4.09  | 1.82E-12 | 3.98E-11 |
| hsa-miR-4463     | 10.11 | 12.24 | 0.62 | 2.69 | -4.36  | 0.0265   | 0.055    |
| hsa-miR-3940-5p  | 10.88 | 13.01 | 0.51 | 1.32 | -4.39  | 1.06E-06 | 1.04E-05 |
| hsa-miR-4488     | 11.41 | 13.59 | 0.52 | 0.69 | -4.53  | 2.74E-12 | 5.85E-11 |
| hsa-miR-2277-5p  | 3.7   | 5.89  | 0.89 | 3.12 | -4.55  | 0.0016   | 0.0061   |
| hsa-miR-1908-5p  | 10.96 | 13.14 | 0.41 | 0.97 | -4.56  | 2.31E-10 | 3.79E-09 |
| hsa-miR-4516     | 11.49 | 13.94 | 0.86 | 0.44 | -5.47  | 7.79E-14 | 1.97E-12 |
| hsa-miR-548ae-3p | 1.47  | 3.95  | 0.5  | 2.18 | -5.59  | 6.80E-06 | 5.76E-05 |
| hsa-miR-4281     | 9.91  | 12.45 | 0.59 | 2.87 | -5.8   | 0.0225   | 0.0484   |
| hsa-miR-4745-5p  | 10.45 | 13.11 | 0.64 | 3.11 | -6.3   | 0.0284   | 0.0581   |
| hsa-miR-4497     | 11.15 | 13.96 | 0.74 | 0.37 | -7.05  | 3.22E-18 | 1.15E-16 |
| hsa-miR-4274     | 2.49  | 5.39  | 0.63 | 2.12 | -7.47  | 7.05E-07 | 7.22E-06 |
| hsa-miR-1469     | 10.2  | 13.58 | 0.62 | 0.43 | -10.39 | 3.93E-22 | 1.95E-20 |
| hsa-miR-4674     | 8.09  | 11.71 | 0.76 | 3.73 | -12.32 | 0.0031   | 0.0104   |
| hsa-miR-4707-5p  | 9.15  | 12.93 | 0.73 | 0.73 | -13.69 | 7.24E-19 | 2.76E-17 |
| hsa-let-7f-1-3p  | 2.14  | 6.12  | 0.65 | 3.39 | -15.82 | 4.41E-06 | 3.95E-05 |
| hsa-miR-548a-3p  | 2.41  | 6.57  | 0.82 | 3.22 | -17.97 | 1.21E-06 | 1.18E-05 |
| hsa-miR-933      | 3.63  | 7.87  | 0.67 | 3.54 | -18.83 | 6.34E-06 | 5.45E-05 |
| hsa-miR-663a     | 8.3   | 12.64 | 0.51 | 2.92 | -20.14 | 3.93E-05 | 0.0003   |
| hsa-miR-3921     | 2.12  | 6.65  | 0.83 | 2.85 | -22.99 | 2.05E-07 | 2.26E-06 |
| hsa-miR-3619-5p  | 3.46  | 8.11  | 0.43 | 3.03 | -25.11 | 3.21E-07 | 3.49E-06 |

|                 |      |       |      |      |         |          |          |
|-----------------|------|-------|------|------|---------|----------|----------|
| hsa-miR-3613-5p | 2.27 | 7.06  | 2.34 | 3.59 | -27.65  | 0.0003   | 0.0015   |
| hsa-miR-191-3p  | 3.24 | 8.06  | 0.74 | 4.12 | -28.2   | 9.70E-06 | 7.92E-05 |
| hsa-miR-4529-3p | 2.66 | 7.96  | 0.77 | 3.25 | -39.29  | 1.01E-07 | 1.16E-06 |
| hsa-miR-378h    | 2.89 | 8.45  | 0.62 | 2.64 | -47.02  | 7.76E-12 | 1.56E-10 |
| hsa-miR-1280    | 6.61 | 12.63 | 1.02 | 1.73 | -64.82  | 3.10E-15 | 8.73E-14 |
| hsa-miR-4706    | 4.37 | 10.41 | 0.58 | 2.35 | -66.08  | 9.13E-13 | 2.08E-11 |
| hsa-miR-3613-3p | 7.72 | 13.82 | 1.37 | 0.81 | -68.61  | 1.82E-20 | 7.78E-19 |
| hsa-miR-4668-5p | 7.61 | 13.95 | 1.74 | 0.59 | -80.91  | 4.77E-19 | 1.86E-17 |
| hsa-miR-1184    | 3.43 | 9.8   | 0.97 | 3.5  | -82.89  | 1.39E-08 | 1.81E-07 |
| hsa-miR-1228-3p | 3.49 | 10.09 | 0.82 | 2.69 | -97.01  | 5.49E-12 | 1.13E-10 |
| hsa-miR-4532    | 6.83 | 13.9  | 0.76 | 0.38 | -134.24 | 6.31E-33 | 1.69E-30 |
| hsa-miR-1281    | 6.66 | 13.79 | 1.12 | 0.49 | -139.36 | 6.96E-27 | 6.33E-25 |
| hsa-miR-3178    | 6.33 | 13.45 | 0.62 | 0.86 | -139.75 | 7.48E-29 | 9.50E-27 |
| hsa-miR-940     | 4.12 | 11.6  | 0.85 | 1.46 | -178.7  | 2.83E-22 | 1.41E-20 |
| hsa-miR-455-3p  | 5.34 | 13.12 | 1.25 | 1.48 | -219.11 | 2.39E-20 | 1.00E-18 |
| hsa-miR-122-5p  | 4.93 | 13.38 | 1.56 | 4.7  | -348.64 | 2.16E-06 | 2.02E-05 |
| hsa-miR-1825    | 4.88 | 13.39 | 0.92 | 1.13 | -365.17 | 7.82E-26 | 5.73E-24 |
| hsa-miR-4487    | 3.99 | 12.75 | 0.81 | 0.88 | -432.58 | 4.66E-30 | 7.51E-28 |
| hsa-miR-4484    | 5.04 | 14.34 | 1.01 | 0.19 | -633.09 | 1.58E-34 | 4.47E-32 |

**Table S3:** miRNA families expressed in whole blood and serum

| <b>FAMILIES IN WHOLE BLOOD</b> |                                                       |                               |            |            |
|--------------------------------|-------------------------------------------------------|-------------------------------|------------|------------|
| <b>Family</b>                  | <b>let-7/98/4458/4500</b>                             |                               |            |            |
| <b>11/11</b>                   | <b>Mean avg log2 signal</b>                           | <b>Median avg log2 signal</b> | <b>Min</b> | <b>Max</b> |
| hsa-let-7a-5p                  | 12.898486                                             | 13.450455                     | 10.45187   | 13.94199   |
| hsa-let-7b-5p                  | 14.7157475                                            | 15.279165                     | 12.70712   | 15.67529   |
| hsa-let-7c-5p                  | 13.575469                                             | 14.077915                     | 10.35575   | 14.50035   |
| hsa-let-7d-5p                  | 13.221659                                             | 13.5897                       | 11.4002    | 13.78844   |
| hsa-let-7e-5p                  | 7.6171803                                             | 8.753424                      | 4.453341   | 9.432898   |
| hsa-let-7f-5p                  | 9.4127488                                             | 10.86407                      | 4.983291   | 11.83872   |
| hsa-let-7g-5p                  | 10.4320745                                            | 12.015415                     | 6.057606   | 12.62968   |
| hsa-let-7i-5p                  | 12.25869645                                           | 13.21787                      | 8.624542   | 13.49819   |
| hsa-miR-4458                   | 1.672109205                                           | 1.6576885                     | 0.7624265  | 2.523499   |
| hsa-miR-4500                   | 3.310374735                                           | 4.1290715                     | 0.872941   | 5.704439   |
| hsa-miR-98-5p                  | 5.04120085                                            | 6.2376825                     | 1.316216   | 7.282755   |
| <b>Family</b>                  | <b>miR-103a/107/107ab</b>                             |                               |            |            |
| <b>2/2</b>                     | <b>Mean avg log2 signal</b>                           | <b>Median avg log2 signal</b> | <b>Min</b> | <b>Max</b> |
| hsa-miR-103a-3p                | 13.3174205                                            | 13.338685                     | 12.67991   | 13.74401   |
| hsa-miR-107                    | 13.035596                                             | 13.08912                      | 12.14367   | 13.44128   |
| <b>Family</b>                  | <b>miR-1207-5p/4763-3p</b>                            |                               |            |            |
| <b>2/2</b>                     | <b>Mean avg log2 signal</b>                           | <b>Median avg log2 signal</b> | <b>Min</b> | <b>Max</b> |
| hsa-miR-1207-5p                | 9.6653736                                             | 9.569501                      | 8.532763   | 10.99559   |
| hsa-miR-4763-3p                | 11.1581676                                            | 11.202305                     | 9.837146   | 12.48545   |
| <b>Family</b>                  | <b>miR-130ac/301ab/301b/301b-3p/454/721/4295/3666</b> |                               |            |            |
| <b>4/4</b>                     | <b>Mean avg log2 signal</b>                           | <b>Median avg log2 signal</b> | <b>Min</b> | <b>Max</b> |
| hsa-miR-130a-3p                | 8.88228835                                            | 9.341063                      | 6.95453    | 10.32921   |
| hsa-miR-130b-3p                | 9.9758087                                             | 10.08863                      | 9.142858   | 10.70487   |
| hsa-miR-301a-3p                | 1.1125341                                             | 1.108107                      | 0.6327404  | 2.363882   |
| hsa-miR-454-3p                 | 4.73473102                                            | 6.120035                      | 0.6522533  | 8.081027   |
| <b>Family</b>                  | <b>miR-1260/1260b/1391</b>                            |                               |            |            |
| <b>2/2</b>                     | <b>Mean avg log2 signal</b>                           | <b>Median avg log2 signal</b> | <b>Min</b> | <b>Max</b> |
| hsa-miR-1260a                  | 3.15088185                                            | 2.9304065                     | 1.560665   | 5.077653   |
| hsa-miR-1260b                  | 6.3962241                                             | 6.0939625                     | 5.107658   | 8.03319    |
| <b>Family</b>                  | <b>miR-1268/1268b</b>                                 |                               |            |            |
| <b>2/2</b>                     | <b>Mean avg log2 signal</b>                           | <b>Median avg log2 signal</b> | <b>Min</b> | <b>Max</b> |
| hsa-miR-1268a                  | 8.6119876                                             | 8.663597                      | 7.666307   | 9.54143    |
| hsa-miR-1268b                  | 8.2284553                                             | 8.305124                      | 7.381428   | 9.191389   |
| <b>Family</b>                  | <b>miR-1275/4665-5p</b>                               |                               |            |            |
| <b>2/2</b>                     | <b>Mean avg log2 signal</b>                           | <b>Median avg log2 signal</b> | <b>Min</b> | <b>Max</b> |
| hsa-miR-1275                   | 4.612554                                              | 4.5526735                     | 2.376538   | 6.309568   |
| hsa-miR-4665-5p                | 5.45970655                                            | 5.4214115                     | 4.409567   | 6.900012   |

| Family          |                      | miR-1346/3940-5p/4507                              |           |          |
|-----------------|----------------------|----------------------------------------------------|-----------|----------|
| 2/2             | Mean avg log2 signal | Median avg log2 signal                             | Min       | Max      |
| hsa-miR-3940-5p | 10.807938            | 10.83619                                           | 9.58687   | 12.02106 |
| hsa-miR-4507    | 10.9915856           | 11.192245                                          | 9.587625  | 12.46904 |
| Family          |                      | miR-146ac/146b-5p                                  |           |          |
| 2/2             | Mean avg log2 signal | Median avg log2 signal                             | Min       | Max      |
| hsa-miR-146a-5p | 6.9529938            | 7.299675                                           | 3.47011   | 8.793442 |
| hsa-miR-146b-5p | 4.8173639            | 6.0506235                                          | 1.112573  | 7.663585 |
| Family          |                      | miR-148ab-3p/152                                   |           |          |
| 3/3             | Mean avg log2 signal | Median avg log2 signal                             | Min       | Max      |
| hsa-miR-148a-3p | 2.7609717            | 2.9900775                                          | 1.032141  | 4.280493 |
| hsa-miR-148b-3p | 5.6649989            | 5.7930435                                          | 4.280577  | 6.914677 |
| hsa-miR-152-3p  | 3.216250375          | 3.334524                                           | 0.8434375 | 5.672692 |
| Family          |                      | miR-15abc/16/16abc/195/322/424/497/1907            |           |          |
| 5/6             | Mean avg log2 signal | Median avg log2 signal                             | Min       | Max      |
| hsa-miR-15a-5p  | 9.01949075           | 10.004165                                          | 5.429198  | 11.17664 |
| hsa-miR-15b-5p  | 13.5908935           | 13.724665                                          | 11.87652  | 14.10804 |
| hsa-miR-16-5p   | 13.846191            | 14.00892                                           | 12.8509   | 14.96003 |
| hsa-miR-195-5p  | 3.84092482           | 4.361587                                           | 0.6343706 | 6.061136 |
| hsa-miR-497-5p  | 1.34810348           | 1.3513955                                          | 0.7612849 | 2.231621 |
| Family          |                      | miR-151-5p/151b                                    |           |          |
| 2/2             | Mean avg log2 signal | Median avg log2 signal                             | Min       | Max      |
| hsa-miR-151a-5p | 12.2124315           | 12.2629                                            | 11.44741  | 12.94877 |
| hsa-miR-151b    | 9.713841             | 9.957894                                           | 8.38445   | 10.70801 |
| Family          |                      | miR-1599/4419a/4510                                |           |          |
| 2/2             | Mean avg log2 signal | Median avg log2 signal                             | Min       | Max      |
| hsa-miR-4419a   | 1.379541575          | 1.3695045                                          | 0.7510089 | 2.73024  |
| hsa-miR-4510    | 3.94564115           | 4.295832                                           | 1.866084  | 5.831294 |
| Family          |                      | miR-1607/1777b/3180-3p/3196                        |           |          |
| 3/3             | Mean avg log2 signal | Median avg log2 signal                             | Min       | Max      |
| hsa-miR-3180    | 3.89449805           | 4.1065495                                          | 1.906312  | 5.316168 |
| hsa-miR-3180-3p | 4.25329525           | 4.36974                                            | 2.051952  | 5.709913 |
| hsa-miR-3196    | 11.5846967           | 11.58531                                           | 9.775994  | 12.46537 |
| Family          |                      | miR-17/17-5p/20ab/20b-5p/93/106ab/427/518a-3p/519d |           |          |
| 6/7             | Mean avg log2 signal | Median avg log2 signal                             | Min       | Max      |
| hsa-miR-106a-5p | 12.0548603           | 12.64541                                           | 9.456276  | 13.01545 |
| hsa-miR-106b-5p | 10.5454851           | 10.768135                                          | 8.458914  | 11.69474 |
| hsa-miR-17-5p   | 12.2766962           | 12.817355                                          | 9.643184  | 13.22032 |
| hsa-miR-20a-5p  | 10.6389435           | 11.702195                                          | 6.606642  | 12.32075 |
| hsa-miR-20b-5p  | 10.41014615          | 11.3175                                            | 7.120128  | 11.92689 |
| hsa-miR-93-5p   | 13.3162845           | 13.935965                                          | 10.59467  | 14.51626 |



| Family          |                      | miR-181abcd/4262           |           |          |
|-----------------|----------------------|----------------------------|-----------|----------|
| 4/5             | Mean avg log2 signal | Median avg log2 signal     | Min       | Max      |
| hsa-miR-181a-5p | 12.237075            | 12.60924                   | 10.40391  | 13.03827 |
| hsa-miR-181b-5p | 7.4308859            | 7.452602                   | 6.694617  | 8.331334 |
| hsa-miR-181c-5p | 7.05770095           | 7.229053                   | 4.205859  | 8.733038 |
| hsa-miR-181d-5p | 2.479373195          | 2.66759                    | 0.7371904 | 3.693894 |
| Family          |                      | miR-185/882/3473/4306/4644 |           |          |
| 2/2             | Mean avg log2 signal | Median avg log2 signal     | Min       | Max      |
| hsa-miR-185-5p  | 13.6131415           | 13.612415                  | 12.94532  | 14.43655 |
| hsa-miR-4306    | 9.5851533            | 9.625123                   | 8.573886  | 11.08395 |
| Family          |                      | miR-18ab/4735-3p           |           |          |
| 2/3             | Mean avg log2 signal | Median avg log2 signal     | Min       | Max      |
| hsa-miR-18a-5p  | 7.25743645           | 7.9395465                  | 2.650928  | 9.418316 |
| hsa-miR-18b-5p  | 4.86504455           | 5.6011915                  | 1.255617  | 7.00293  |
| Family          |                      | miR-199ab-3p/3129-5p       |           |          |
| 3/3             | Mean avg log2 signal | Median avg log2 signal     | Min       | Max      |
| hsa-miR-199a-3p | 5.039588145          | 6.8201855                  | 0.7457011 | 8.302681 |
| hsa-miR-199b-3p | 5.01880496           | 6.840994                   | 0.7598579 | 8.365027 |
| hsa-miR-3129-5p | 1.082927915          | 1.0715895                  | 0.6388933 | 1.973848 |
| Family          |                      | miR-19ab                   |           |          |
| 2/2             | Mean avg log2 signal | Median avg log2 signal     | Min       | Max      |
| hsa-miR-19a-3p  | 1.761639125          | 1.63291                    | 0.822248  | 4.084675 |
| hsa-miR-19b-3p  | 8.4384416            | 8.3023215                  | 6.276962  | 12.93111 |
| Family          |                      | miR-200bc/429/548a         |           |          |
| 2/3             | Mean avg log2 signal | Median avg log2 signal     | Min       | Max      |
| hsa-miR-200b-3p | 0.96560022           | 0.90483135                 | 0.5848499 | 1.634786 |
| hsa-miR-200c-3p | 6.0023042            | 5.939317                   | 5.236562  | 7.358823 |
| Family          |                      | miR-214/761/3619-5p        |           |          |
| 2/3             | Mean avg log2 signal | Median avg log2 signal     | Min       | Max      |
| hsa-miR-214-3p  | 1.474617935          | 1.26854                    | 0.6382844 | 3.714994 |
| hsa-miR-3619-5p | 3.3383822            | 3.381099                   | 2.603078  | 4.23382  |
| Family          |                      | miR-221/222/222ab/1928     |           |          |
| 2/2             | Mean avg log2 signal | Median avg log2 signal     | Min       | Max      |
| hsa-miR-221-3p  | 8.8113346            | 8.791164                   | 6.99317   | 10.19602 |
| hsa-miR-222-3p  | 10.35618355          | 10.697535                  | 8.079048  | 11.37158 |
| Family          |                      | miR-23abc/23b-3p           |           |          |
| 3/3             | Mean avg log2 signal | Median avg log2 signal     | Min       | Max      |
| hsa-miR-23a-3p  | 11.4533595           | 11.082025                  | 10.46935  | 12.79593 |
| hsa-miR-23b-3p  | 10.26227085          | 10.177485                  | 9.5832    | 11.21023 |
| hsa-miR-23c     | 1.9310684            | 1.8444625                  | 1.299981  | 3.425299 |
| Family          |                      | miR-2428/3473b/3652/4430   |           |          |

| <b>2/2</b>      | <b>Mean avg log2 signal</b>           | <b>Median avg log2 signal</b> | <b>Min</b> | <b>Max</b> |
|-----------------|---------------------------------------|-------------------------------|------------|------------|
| hsa-miR-3652    | 3.27126695                            | 3.4849615                     | 1.600883   | 4.268707   |
| hsa-miR-4430    | 3.4661872                             | 3.665273                      | 2.164359   | 4.308377   |
| <b>Family</b>   | <b>miR-25/32/92abc/363/363-3p/367</b> |                               |            |            |
| <b>5/6</b>      | <b>Mean avg log2 signal</b>           | <b>Median avg log2 signal</b> | <b>Min</b> | <b>Max</b> |
| hsa-miR-25-3p   | 13.2250475                            | 13.17894                      | 12.44407   | 13.88603   |
| hsa-miR-32-5p   | 1.236289285                           | 1.2425095                     | 0.681765   | 1.991363   |
| hsa-miR-363-3p  | 9.88422065                            | 10.52155                      | 6.646354   | 11.17271   |
| hsa-miR-92a-3p  | 14.8355845                            | 14.814775                     | 14.23974   | 15.15251   |
| hsa-miR-92b-3p  | 10.4484363                            | 10.14703                      | 9.273262   | 12.10224   |
| <b>Family</b>   | <b>miR-26ab/1297/4465</b>             |                               |            |            |
| <b>3/4</b>      | <b>Mean avg log2 signal</b>           | <b>Median avg log2 signal</b> | <b>Min</b> | <b>Max</b> |
| hsa-miR-26a-5p  | 12.7091785                            | 12.843085                     | 10.85699   | 13.57324   |
| hsa-miR-26b-5p  | 5.5979821                             | 7.327936                      | 1.003913   | 8.665193   |
| hsa-miR-4465    | 1.205791975                           | 1.1331895                     | 0.6287912  | 1.881693   |
| <b>Family</b>   | <b>miR-27abc/27a-3p</b>               |                               |            |            |
| <b>2/2</b>      | <b>Mean avg log2 signal</b>           | <b>Median avg log2 signal</b> | <b>Min</b> | <b>Max</b> |
| hsa-miR-27a-3p  | 5.08080575                            | 5.0539825                     | 2.995015   | 7.040871   |
| hsa-miR-27b-3p  | 4.46086415                            | 5.230926                      | 1.20245    | 6.585092   |
| <b>Family</b>   | <b>miR-2917/3136-5p/4439</b>          |                               |            |            |
| <b>2/2</b>      | <b>Mean avg log2 signal</b>           | <b>Median avg log2 signal</b> | <b>Min</b> | <b>Max</b> |
| hsa-miR-3136-5p | 2.67716665                            | 3.0741135                     | 0.761285   | 4.617513   |
| hsa-miR-4439    | 1.09546422                            | 1.0443235                     | 0.6915876  | 1.93079    |
| <b>Family</b>   | <b>miR-29abcd</b>                     |                               |            |            |
| <b>3/3</b>      | <b>Mean avg log2 signal</b>           | <b>Median avg log2 signal</b> | <b>Min</b> | <b>Max</b> |
| hsa-miR-29a-3p  | 5.3892634                             | 5.494406                      | 1.787211   | 6.962849   |
| hsa-miR-29b-3p  | 1.2963238                             | 1.2037475                     | 0.6151571  | 2.535277   |
| hsa-miR-29c-3p  | 1.3877182                             | 1.249247                      | 0.7324927  | 2.721197   |
| <b>Family</b>   | <b>miR-30abcdef/30abe-5p/384-5p</b>   |                               |            |            |
| <b>5/5</b>      | <b>Mean avg log2 signal</b>           | <b>Median avg log2 signal</b> | <b>Min</b> | <b>Max</b> |
| hsa-miR-30a-5p  | 6.27376395                            | 6.260433                      | 4.451009   | 7.526642   |
| hsa-miR-30b-5p  | 7.7415504                             | 6.86455                       | 5.085124   | 12.34427   |
| hsa-miR-30c-5p  | 10.64205735                           | 9.440242                      | 8.276537   | 13.50391   |
| hsa-miR-30d-5p  | 10.3848615                            | 10.37724                      | 9.167439   | 12.38509   |
| hsa-miR-30e-5p  | 4.18209515                            | 4.4859385                     | 1.504991   | 5.907619   |
| <b>Family</b>   | <b>miR-320abcd/4429</b>               |                               |            |            |
| <b>5/5</b>      | <b>Mean avg log2 signal</b>           | <b>Median avg log2 signal</b> | <b>Min</b> | <b>Max</b> |
| hsa-miR-320a    | 13.4507005                            | 13.46148                      | 12.75272   | 13.9659    |
| hsa-miR-320b    | 13.4159215                            | 13.421025                     | 12.76114   | 13.95109   |
| hsa-miR-320c    | 13.3393435                            | 13.382045                     | 12.73396   | 13.8791    |
| hsa-miR-320d    | 12.5435665                            | 12.57789                      | 11.87254   | 13.4777    |

|                  |                                |                               |            |            |
|------------------|--------------------------------|-------------------------------|------------|------------|
| hsa-miR-4429     | 11.385783                      | 11.33137                      | 10.74698   | 12.71708   |
| <b>Family</b>    | <b>miR-3201/4791</b>           |                               |            |            |
| <b>2/2</b>       | <b>Mean avg log2 signal</b>    | <b>Median avg log2 signal</b> | <b>Min</b> | <b>Max</b> |
| hsa-miR-3201     | 2.49592025                     | 2.176582                      | 0.913062   | 6.261142   |
| hsa-miR-4791     | 1.218232355                    | 1.2117025                     | 0.7351692  | 2.091576   |
| <b>Family</b>    | <b>miR-326/330/330-5p</b>      |                               |            |            |
| <b>2/2</b>       | <b>Mean avg log2 signal</b>    | <b>Median avg log2 signal</b> | <b>Min</b> | <b>Max</b> |
| hsa-miR-326      | 3.1760363                      | 2.925112                      | 1.2592     | 5.720776   |
| hsa-miR-330-5p   | 2.8148072                      | 3.067998                      | 1.354023   | 4.336797   |
| <b>Family</b>    | <b>miR-3622ab-3p</b>           |                               |            |            |
| <b>2/2</b>       | <b>Mean avg log2 signal</b>    | <b>Median avg log2 signal</b> | <b>Min</b> | <b>Max</b> |
| hsa-miR-3622a-3p | 2.17124619                     | 2.15118                       | 0.7331078  | 3.26551    |
| hsa-miR-3622b-3p | 1.95652625                     | 1.776769                      | 1.159483   | 3.115204   |
| <b>Family</b>    | <b>miR-362-5p/500b</b>         |                               |            |            |
| <b>2/2</b>       | <b>Mean avg log2 signal</b>    | <b>Median avg log2 signal</b> | <b>Min</b> | <b>Max</b> |
| hsa-miR-362-5p   | 8.132611                       | 8.067062                      | 7.072094   | 10.22527   |
| hsa-miR-500b-5p  | 1.497982825                    | 1.426694                      | 0.615822   | 3.054981   |
| <b>Family</b>    | <b>miR-374ab</b>               |                               |            |            |
| <b>2/2</b>       | <b>Mean avg log2 signal</b>    | <b>Median avg log2 signal</b> | <b>Min</b> | <b>Max</b> |
| hsa-miR-374a-5p  | 1.01250771                     | 1.0355985                     | 0.6720278  | 1.329449   |
| hsa-miR-374b-5p  | 1.068699655                    | 1.014693                      | 0.6220243  | 1.987553   |
| <b>Family</b>    | <b>miR-378/422a/378bcdefhi</b> |                               |            |            |
| <b>9/9</b>       | <b>Mean avg log2 signal</b>    | <b>Median avg log2 signal</b> | <b>Min</b> | <b>Max</b> |
| hsa-miR-378a-3p  | 9.95457555                     | 10.10124                      | 8.56129    | 10.63236   |
| hsa-miR-378b     | 1.84170509                     | 1.853494                      | 0.9340728  | 2.71809    |
| hsa-miR-378c     | 8.9287751                      | 9.1786515                     | 7.399598   | 9.682161   |
| hsa-miR-378d     | 6.6496475                      | 6.978897                      | 4.141099   | 7.597953   |
| hsa-miR-378e     | 3.9771106                      | 4.7374465                     | 1.116264   | 5.211974   |
| hsa-miR-378f     | 8.0679857                      | 8.438324                      | 5.702308   | 8.763234   |
| hsa-miR-378h     | 2.8103731                      | 2.888118                      | 1.462944   | 4.287439   |
| hsa-miR-378i     | 8.22607305                     | 8.610106                      | 6.165626   | 8.884276   |
| hsa-miR-422a     | 7.7407268                      | 7.798176                      | 5.75587    | 8.67894    |
| <b>Family</b>    | <b>miR-3929/4419b/4478</b>     |                               |            |            |
| <b>2/3</b>       | <b>Mean avg log2 signal</b>    | <b>Median avg log2 signal</b> | <b>Min</b> | <b>Max</b> |
| hsa-miR-4419b    | 1.09843614                     | 1.0708115                     | 0.6315964  | 1.611429   |
| hsa-miR-4478     | 1.31105597                     | 1.212673                      | 0.8649595  | 2.118065   |
| <b>Family</b>    | <b>miR-4271/4725-3p</b>        |                               |            |            |
| <b>2/2</b>       | <b>Mean avg log2 signal</b>    | <b>Median avg log2 signal</b> | <b>Min</b> | <b>Max</b> |
| hsa-miR-4271     | 2.67177386                     | 2.645739                      | 0.9501572  | 4.128875   |
| hsa-miR-4725-3p  | 2.40025962                     | 2.598544                      | 0.9324124  | 3.375923   |
| <b>Family</b>    | <b>miR-4434/4516</b>           |                               |            |            |

| <b>2/2</b>       | <b>Mean avg log2 signal</b>            | <b>Median avg log2 signal</b> | <b>Min</b> | <b>Max</b> |
|------------------|----------------------------------------|-------------------------------|------------|------------|
| hsa-miR-4434     | 0.96422582                             | 0.9653833                     | 0.5781102  | 1.576081   |
| hsa-miR-4516     | 11.5023617                             | 11.411965                     | 9.966064   | 13.01202   |
| <b>Family</b>    | <b>miR-4447/4472</b>                   |                               |            |            |
| <b>2/2</b>       | <b>Mean avg log2 signal</b>            | <b>Median avg log2 signal</b> | <b>Min</b> | <b>Max</b> |
| hsa-miR-4447     | 2.17316745                             | 2.2142745                     | 1.091441   | 3.353612   |
| hsa-miR-4472     | 1.514443605                            | 1.37873                       | 0.7793875  | 2.39555    |
| <b>Family</b>    | <b>miR-4481/4745-5p</b>                |                               |            |            |
| <b>2/2</b>       | <b>Mean avg log2 signal</b>            | <b>Median avg log2 signal</b> | <b>Min</b> | <b>Max</b> |
| hsa-miR-4481     | 2.9714048                              | 3.158759                      | 1.334301   | 3.935843   |
| hsa-miR-4745-5p  | 10.2985313                             | 10.349565                     | 8.739562   | 11.55694   |
| <b>Family</b>    | <b>miR-4706/4749-5p</b>                |                               |            |            |
| <b>2/2</b>       | <b>Mean avg log2 signal</b>            | <b>Median avg log2 signal</b> | <b>Min</b> | <b>Max</b> |
| hsa-miR-4706     | 4.23448315                             | 4.3281415                     | 2.331694   | 5.07913    |
| hsa-miR-4749-5p  | 5.0742068                              | 5.1827215                     | 4.45028    | 5.956599   |
| <b>Family</b>    | <b>miR-501-3p/502-3p/500/502a</b>      |                               |            |            |
| <b>2/2</b>       | <b>Mean avg log2 signal</b>            | <b>Median avg log2 signal</b> | <b>Min</b> | <b>Max</b> |
| hsa-miR-501-3p   | 8.79339705                             | 8.687498                      | 8.0463     | 10.32675   |
| hsa-miR-502-3p   | 9.54387435                             | 9.5669825                     | 8.52847    | 11.27128   |
| <b>Family</b>    | <b>miR-504/4725-5p</b>                 |                               |            |            |
| <b>2/2</b>       | <b>Mean avg log2 signal</b>            | <b>Median avg log2 signal</b> | <b>Min</b> | <b>Max</b> |
| hsa-miR-4725-5p  | 2.16070075                             | 2.1607765                     | 1.011277   | 3.509783   |
| hsa-miR-504-5p   | 1.61891665                             | 1.4653605                     | 0.8359687  | 3.497378   |
| <b>Family</b>    | <b>miR-548abakhjiwy/548abcd-5p/559</b> |                               |            |            |
| <b>2/12</b>      | <b>Mean avg log2 signal</b>            | <b>Median avg log2 signal</b> | <b>Min</b> | <b>Max</b> |
| hsa-miR-548ab    | 1.01595683                             | 1.0043047                     | 0.6218158  | 1.477092   |
| hsa-miR-548i     | 1.025059185                            | 0.9844798                     | 0.7193273  | 1.631554   |
| <b>Family</b>    | <b>miR-548aeajamx</b>                  |                               |            |            |
| <b>3/4</b>       | <b>Mean avg log2 signal</b>            | <b>Median avg log2 signal</b> | <b>Min</b> | <b>Max</b> |
| hsa-miR-548ae-3p | 1.508722405                            | 1.416429                      | 0.8639881  | 2.491318   |
| hsa-miR-548aj-3p | 1.517676365                            | 1.359319                      | 0.8354787  | 3.048688   |
| hsa-miR-548x-3p  | 1.55738969                             | 1.4719475                     | 0.8407043  | 2.83375    |
| <b>Family</b>    | <b>miR-548d-3p/548acbz</b>             |                               |            |            |
| <b>2/4</b>       | <b>Mean avg log2 signal</b>            | <b>Median avg log2 signal</b> | <b>Min</b> | <b>Max</b> |
| hsa-miR-548ac    | 1.957020985                            | 1.884735                      | 0.8729837  | 4.342703   |
| hsa-miR-548z     | 1.34895855                             | 1.1588105                     | 0.772961   | 2.974461   |
| <b>Family</b>    | <b>miR-641/3617</b>                    |                               |            |            |
| <b>2/2</b>       | <b>Mean avg log2 signal</b>            | <b>Median avg log2 signal</b> | <b>Min</b> | <b>Max</b> |
| hsa-miR-3617-5p  | 1.233971425                            | 1.197068                      | 0.5541543  | 1.820657   |
| hsa-miR-641      | 2.10549725                             | 1.866368                      | 1.145179   | 5.677279   |

| Family            |                      | miR-663/663a/1908      |           |          |
|-------------------|----------------------|------------------------|-----------|----------|
| 2/2               | Mean avg log2 signal | Median avg log2 signal | Min       | Max      |
| hsa-miR-1908-5p   | 10.8654924           | 10.93312               | 9.716728  | 11.54811 |
| hsa-miR-663a      | 8.15983015           | 8.2722395              | 6.89099   | 9.13215  |
| Family            |                      | miR-762/4492/4498      |           |          |
| 3/3               | Mean avg log2 signal | Median avg log2 signal | Min       | Max      |
| hsa-miR-4492      | 10.3242048           | 10.36615               | 8.949589  | 11.95001 |
| hsa-miR-4498      | 3.19267263           | 3.340617               | 0.9765656 | 4.137019 |
| hsa-miR-762       | 11.3565026           | 11.459765              | 9.842562  | 12.35717 |
| Family            |                      | miR-96/507/1271        |           |          |
| 2/2               | Mean avg log2 signal | Median avg log2 signal | Min       | Max      |
| hsa-miR-1271-5p   | 4.4791036            | 4.2760125              | 1.892052  | 6.561436 |
| hsa-miR-96-5p     | 1.99137435           | 1.5174105              | 0.6139191 | 5.378518 |
| Family            |                      | miR-99ab/100           |           |          |
| 2/2               | Mean avg log2 signal | Median avg log2 signal | Min       | Max      |
| hsa-miR-100-5p    | 6.1346097            | 6.400215               | 1.58824   | 10.17722 |
| hsa-miR-99a-5p    | 4.25628325           | 4.2469215              | 1.614767  | 7.333538 |
| hsa-miR-99b-5p    | 5.8403383            | 5.5560085              | 1.841449  | 8.240961 |
| FAMILIES IN SERUM |                      |                        |           |          |
| Family            |                      | let-7/98/4458/4500     |           |          |
| 5/11              | Mean avg log2 signal | Median avg log2 signal | Min       | Max      |
| hsa-let-7a-5p     | 2.35574122           | 1.3626195              | 0.9671984 | 8.522055 |
| hsa-let-7b-5p     | 8.722545235          | 11.001215              | 0.9136667 | 14.10612 |
| hsa-let-7c-5p     | 4.2065813            | 2.4261785              | 0.8663921 | 13.40558 |
| hsa-let-7d-5p     | 3.065713295          | 1.77158                | 0.8507624 | 10.76772 |
| hsa-let-7i-5p     | 4.007933925          | 2.499583               | 0.8028431 | 11.47828 |
| Family            |                      | miR-103a/107/107ab     |           |          |
| 2/2               | Mean avg log2 signal | Median avg log2 signal | Min       | Max      |
| hsa-miR-103a-3p   | 5.44771043           | 4.5605605              | 0.8645353 | 12.70128 |
| hsa-miR-107       | 5.73106166           | 5.388365               | 0.7056093 | 12.39119 |
| Family            |                      | miR-1207-5p/4763-3p    |           |          |
| 2/2               | Mean avg log2 signal | Median avg log2 signal | Min       | Max      |
| hsa-miR-1207-5p   | 6.03900415           | 5.420463               | 1.270911  | 12.58873 |
| hsa-miR-4763-3p   | 13.020282            | 13.21241               | 11.24157  | 13.86009 |
| Family            |                      | miR-1260/1260b/1391    |           |          |
| 2/2               | Mean avg log2 signal | Median avg log2 signal | Min       | Max      |
| hsa-miR-1260a     | 2.666001305          | 2.206878               | 0.8479171 | 6.457009 |
| hsa-miR-1260b     | 3.5746712            | 3.0856235              | 1.075187  | 9.426715 |
| Family            |                      | miR-1268/1268b         |           |          |
| 2/2               | Mean avg log2 signal | Median avg log2 signal | Min       | Max      |
| hsa-miR-1268a     | 7.084842             | 8.0149515              | 1.21516   | 13.26256 |

|                 |                                                           |                               |            |            |
|-----------------|-----------------------------------------------------------|-------------------------------|------------|------------|
| hsa-miR-1268b   | 5.4117592                                                 | 3.2747305                     | 1.043564   | 13.25067   |
| <b>Family</b>   | <b>miR-130ac/301ab/301b/301b-3p/454/721/4295/3666</b>     |                               |            |            |
| <b>2/4</b>      | <b>Mean avg log2 signal</b>                               | <b>Median avg log2 signal</b> | <b>Min</b> | <b>Max</b> |
| hsa-miR-130a-3p | 2.118834955                                               | 1.371458                      | 0.6623483  | 8.970987   |
| hsa-miR-130b-3p | 3.81855781                                                | 2.008955                      | 0.8781023  | 12.1135    |
| <b>Family</b>   | <b>miR-1346/3940-5p/4507</b>                              |                               |            |            |
| <b>2/2</b>      | <b>Mean avg log2 signal</b>                               | <b>Median avg log2 signal</b> | <b>Min</b> | <b>Max</b> |
| hsa-miR-3940-5p | 12.6052633                                                | 12.997545                     | 8.817486   | 14.00869   |
| hsa-miR-4507    | 12.0132295                                                | 12.524135                     | 10.07962   | 13.2831    |
| <b>Family</b>   | <b>miR-15abc/16/16abc/195/322/424/497/1907</b>            |                               |            |            |
| <b>3/6</b>      | <b>Mean avg log2 signal</b>                               | <b>Median avg log2 signal</b> | <b>Min</b> | <b>Max</b> |
| hsa-miR-15a-5p  | 1.42684183                                                | 1.279123                      | 0.8413577  | 3.226015   |
| hsa-miR-15b-5p  | 2.082156905                                               | 1.2515565                     | 0.8274632  | 9.97176    |
| hsa-miR-16-5p   | 8.148942835                                               | 11.60187                      | 0.7741661  | 14.16446   |
| <b>Family</b>   | <b>miR-17/17-5p/20ab/20b-5p/93/106ab/427/518a-3p/519d</b> |                               |            |            |
| <b>6/7</b>      | <b>Mean avg log2 signal</b>                               | <b>Median avg log2 signal</b> | <b>Min</b> | <b>Max</b> |
| hsa-miR-106a-5p | 5.3289351                                                 | 2.530807                      | 1.188536   | 12.88918   |
| hsa-miR-106b-5p | 5.566443385                                               | 5.748272                      | 0.8753357  | 11.94596   |
| hsa-miR-17-5p   | 6.591437085                                               | 7.9273075                     | 0.6702414  | 13.05287   |
| hsa-miR-20a-5p  | 4.16534026                                                | 2.135872                      | 0.7367697  | 12.22935   |
| hsa-miR-20b-5p  | 2.54532543                                                | 1.21408                       | 0.761919   | 8.38322    |
| hsa-miR-93-5p   | 7.44756748                                                | 9.915284                      | 0.8739204  | 13.30775   |
| <b>Family</b>   | <b>miR-181abcd/4262</b>                                   |                               |            |            |
| <b>2/5</b>      | <b>Mean avg log2 signal</b>                               | <b>Median avg log2 signal</b> | <b>Min</b> | <b>Max</b> |
| hsa-miR-181a-5p | 3.03341475                                                | 1.560447                      | 1.040275   | 9.706189   |
| hsa-miR-181b-5p | 1.57859475                                                | 1.4216735                     | 0.7873859  | 3.882611   |
| <b>Family</b>   | <b>miR-185/882/3473/4306/4644</b>                         |                               |            |            |
| <b>2/2</b>      | <b>Mean avg log2 signal</b>                               | <b>Median avg log2 signal</b> | <b>Min</b> | <b>Max</b> |
| hsa-miR-185-5p  | 10.10144385                                               | 12.752095                     | 1.352456   | 13.71814   |
| hsa-miR-4306    | 2.016822855                                               | 1.358952                      | 0.7833662  | 7.626094   |
| <b>Family</b>   | <b>miR-221/222/222ab/1928</b>                             |                               |            |            |
| <b>2/2</b>      | <b>Mean avg log2 signal</b>                               | <b>Median avg log2 signal</b> | <b>Min</b> | <b>Max</b> |
| hsa-miR-3940-5p | 12.6052633                                                | 2.537273                      | 0.6532183  | 11.25889   |
| hsa-miR-4507    | 12.0132295                                                | 1.637232                      | 0.884634   | 10.15192   |
| <b>Family</b>   | <b>miR-23abc/23b-3p</b>                                   |                               |            |            |
| <b>3/3</b>      | <b>Mean avg log2 signal</b>                               | <b>Median avg log2 signal</b> | <b>Min</b> | <b>Max</b> |
| hsa-miR-23a-3p  | 8.055227245                                               | 11.66187                      | 0.9300919  | 13.43877   |
| hsa-miR-23b-3p  | 4.240516745                                               | 2.0237855                     | 0.7400599  | 10.50028   |
| hsa-miR-23c     | 1.71279453                                                | 1.516901                      | 0.9382154  | 4.21056    |
| <b>Family</b>   | <b>miR-25/32/92abc/363/363-3p/367</b>                     |                               |            |            |
| <b>4/6</b>      | <b>Mean avg log2 signal</b>                               | <b>Median avg log2 signal</b> | <b>Min</b> | <b>Max</b> |

|                  |                                        |                               |            |            |
|------------------|----------------------------------------|-------------------------------|------------|------------|
| hsa-miR-25-3p    | 7.151478735                            | 9.6425435                     | 0.7854748  | 13.13439   |
| hsa-miR-32-5p    | 2.09611176                             | 1.77058                       | 0.9258198  | 8.630038   |
| hsa-miR-92a-3p   | 10.36045135                            | 13.43241                      | 1.34765    | 14.31478   |
| hsa-miR-92b-3p   | 5.373205925                            | 5.3916845                     | 0.9702005  | 11.65615   |
| <b>Family</b>    | <b>miR-30abcdef/30abe-5p/384-5p</b>    |                               |            |            |
| <b>2/5</b>       | <b>Mean avg log2 signal</b>            | <b>Median avg log2 signal</b> | <b>Min</b> | <b>Max</b> |
| hsa-miR-30a-5p   | 1.536562725                            | 1.3223155                     | 0.7598438  | 5.327148   |
| hsa-miR-30d-5p   | 2.7577055                              | 1.934687                      | 1.10609    | 6.025137   |
| <b>Family</b>    | <b>miR-320abcd/4429</b>                |                               |            |            |
| <b>5/5</b>       | <b>Mean avg log2 signal</b>            | <b>Median avg log2 signal</b> | <b>Min</b> | <b>Max</b> |
| hsa-miR-320a     | 13.527687                              | 13.62571                      | 12.43165   | 14.04206   |
| hsa-miR-320b     | 13.436803                              | 13.56419                      | 12.24199   | 13.92185   |
| hsa-miR-320c     | 13.282577                              | 13.46865                      | 12.13927   | 13.82717   |
| hsa-miR-320d     | 11.975554                              | 12.15997                      | 94.82784   | 13.34144   |
| hsa-miR-4429     | 8.517073                               | 9.414505                      | 0.866147   | 12.65761   |
| <b>Family</b>    | <b>miR-3201/4791</b>                   |                               |            |            |
| <b>2/2</b>       | <b>Mean avg log2 signal</b>            | <b>Median avg log2 signal</b> | <b>Min</b> | <b>Max</b> |
| hsa-miR-3201     | 4.7130031                              | 1.8166565                     | 1.062672   | 13.54973   |
| hsa-miR-4791     | 1.482768505                            | 1.158821                      | 0.5851555  | 4.649663   |
| <b>Family</b>    | <b>miR-378/422a/378bcdefhi</b>         |                               |            |            |
| <b>5/9</b>       | <b>Mean avg log2 signal</b>            | <b>Median avg log2 signal</b> | <b>Min</b> | <b>Max</b> |
| hsa-miR-378a-3p  | 3.776996615                            | 2.1639765                     | 0.9258423  | 11.02324   |
| hsa-miR-378c     | 2.137942045                            | 1.6998945                     | 0.7367697  | 6.024651   |
| hsa-miR-378f     | 1.613916685                            | 1.25083                       | 0.8604646  | 6.608524   |
| hsa-miR-378h     | 8.5265404                              | 8.4223635                     | 2.201951   | 12.75222   |
| hsa-miR-378i     | 1.5043903                              | 1.1657165                     | 0.6607714  | 6.923134   |
| <b>Family</b>    | <b>miR-4481/4745-5p</b>                |                               |            |            |
| <b>2/2</b>       | <b>Mean avg log2 signal</b>            | <b>Median avg log2 signal</b> | <b>Min</b> | <b>Max</b> |
| hsa-miR-4481     | 1.97176223                             | 1.7406065                     | 0.8108046  | 5.396856   |
| hsa-miR-4745-5p  | 11.8925181                             | 13.07332                      | 2.480342   | 14.06308   |
| <b>Family</b>    | <b>miR-548abakhjiwy/548abcd-5p/559</b> |                               |            |            |
| <b>2/12</b>      | <b>Mean avg log2 signal</b>            | <b>Median avg log2 signal</b> | <b>Min</b> | <b>Max</b> |
| hsa-miR-548i     | 1.03648826                             | 1.02679345                    | 0.5986478  | 1.846887   |
| hsa-miR-559      | 1.50460346                             | 1.306624                      | 0.849665   | 3.120622   |
| <b>Family</b>    | <b>miR-548aeajamx</b>                  |                               |            |            |
| <b>3/4</b>       | <b>Mean avg log2 signal</b>            | <b>Median avg log2 signal</b> | <b>Min</b> | <b>Max</b> |
| hsa-miR-548ae-3p | 4.02563842                             | 3.8453635                     | 0.9625864  | 8.106996   |
| hsa-miR-548aj-3p | 2.621365225                            | 1.864342                      | 0.9912795  | 7.328541   |
| hsa-miR-548x-3p  | 2.9407676                              | 1.878434                      | 1.070633   | 7.826774   |

| <b>Family</b> |                             | <b>miR-548d-3p/548acbz</b>    |            |            |
|---------------|-----------------------------|-------------------------------|------------|------------|
| <b>2/4</b>    | <b>Mean avg log2 signal</b> | <b>Median avg log2 signal</b> | <b>Min</b> | <b>Max</b> |
| hsa-miR-548ac | 4.4635448                   | 3.4339315                     | 1.070057   | 10.00958   |
| hsa-miR-548z  | 2.12570635                  | 1.5744575                     | 1.016919   | 6.564924   |
| <b>Family</b> |                             | <b>miR-762/4492/4498</b>      |            |            |
| <b>2/3</b>    | <b>Mean avg log2 signal</b> | <b>Median avg log2 signal</b> | <b>Min</b> | <b>Max</b> |
| hsa-miR-4492  | 4.76235322                  | 3.190722                      | 0.9150324  | 12.83638   |
| hsa-miR-762   | 13.3660885                  | 13.57404                      | 11.78227   | 14.20542   |



**Table S4:** miR-378h target gene enrichment analysis

| <b>PANTHER Pathways</b>                                                           | <b>H. sapiens<br/>(RFF) #</b> | <b>upload_1<br/>#</b> | <b>expected</b> | <b>Fold<br/>Enrichment</b> | <b>raw P<br/>value</b> | <b>FDR</b> |
|-----------------------------------------------------------------------------------|-------------------------------|-----------------------|-----------------|----------------------------|------------------------|------------|
| Glutamine glutamate conversion                                                    | 4                             | 1                     | .01             | > 100                      | 8.04E-03               | 2.62E-01   |
| Hypoxia response via HIF activation                                               | 33                            | 2                     | .05             | 37.51                      | 1.45E-03               | 2.37E-01   |
| FAS signaling pathway                                                             | 34                            | 2                     | .05             | 36.40                      | 1.54E-03               | 1.25E-01   |
| p53 pathway by glucose deprivation                                                | 23                            | 1                     | .04             | 26.91                      | 3.80E-02               | 4.77E-01   |
| VEGF signaling pathway                                                            | 68                            | 2                     | .11             | 18.20                      | 5.70E-03               | 3.09E-01   |
| Insulin/IGF pathway-protein kinase B signaling cascade                            | 41                            | 1                     | .07             | 15.09                      | 6.56E-02               | 7.64E-01   |
| p53 pathway feedback loops 2                                                      | 51                            | 1                     | .08             | 12.13                      | 8.06E-02               | 8.76E-01   |
| PI3 kinase pathway                                                                | 55                            | 1                     | .09             | 11.25                      | 8.66E-02               | 8.82E-01   |
| Oxidative stress response                                                         | 58                            | 1                     | .09             | 10.67                      | 9.10E-02               | 8.72E-01   |
| Muscarinic acetylcholine receptor 2 and 4 signaling pathway                       | 63                            | 1                     | .10             | 9.82                       | 9.83E-02               | 8.90E-01   |
| Heterotrimeric G-protein signaling pathway-Gq alpha and Go alpha mediated pathway | 126                           | 2                     | .20             | 9.82                       | 1.81E-02               | 4.91E-01   |
| EGF receptor signaling pathway                                                    | 140                           | 2                     | .23             | 8.84                       | 2.20E-02               | 5.11E-01   |
| Huntington disease                                                                | 145                           | 2                     | .23             | 8.54                       | 2.34E-02               | 4.77E-01   |
| Gonadotropin-releasing hormone receptor pathway                                   | 237                           | 3                     | .38             | 7.83                       | 6.73E-03               | 2.74E-01   |
| Heterotrimeric G-prot sig. pathway-Gi alpha and Gs alpha mediated pathway         | 164                           | 2                     | .26             | 7.55                       | 2.93E-02               | 5.31E-01   |
| Angiogenesis                                                                      | 173                           | 2                     | .28             | 7.15                       | 3.23E-02               | 4.79E-01   |
| CCKR signaling map                                                                | 174                           | 2                     | .28             | 7.11                       | 3.27E-02               | 4.44E-01   |

**Table S5.** Differently expressed miRNA between HCC and Normal Tissue from StarBase v3.0 Database

| miRNA transcript | CancerExp<br>log2(RPM+0.01) | NormalExp<br>log2(RPM+0.01) | FoldChange | pValue   | FDR      |
|------------------|-----------------------------|-----------------------------|------------|----------|----------|
| let-7a-5p        | 30211.46                    | 36668.13                    | 0.82       | 0.00033  | 0.0022   |
| let-7b-5p        | 7507.67                     | 12249.94                    | 0.61       | 4.60E-11 | 1.20E-09 |
| let-7c-5p        | 2230.23                     | 5606.98                     | 0.4        | 3.90E-20 | 3.90E-18 |
| let-7d-5p        | 204.08                      | 167.29                      | 1.22       | ns       | ns       |
| let-7f-1-3p      | 2.29                        | 3.27                        | 0.7        | 9.70E-05 | 0.00074  |
| let-7i-5p        | 227.98                      | 232.63                      | 0.98       | ns       | ns       |
| miR-103a-3p      | 30968.92                    | 16382.16                    | 1.89       | 9.30E-13 | 3.10E-11 |
| miR-106a-5p      | 11.8                        | 9.91                        | 1.19       | 0.04     | ns       |
| miR-106b-5p      | 292.78                      | 164.4                       | 1.78       | 3.90E-09 | 6.90E-08 |
| miR-107          | 151.54                      | 116.53                      | 1.3        | 0.013    | 0.053    |
| miR-1184         | nd                          |                             |            |          |          |
| miR-1207-5p      | nd                          |                             |            |          |          |
| miR-1224-5p      | 0.9                         | 0.21                        | 4.26       | ns       | ns       |
| miR-1225-5p      | nd                          |                             |            |          |          |
| miR-122-5p       | 23817.07                    | 38890.1                     | 0.61       | 6.90E-06 | 6.60E-05 |
| miR-1228-3p      | 1.29                        | 1.58                        | 0.81       | 0.0018   | 0.0098   |
| miR-1234-3p      | 0.08                        | 0.06                        | 1.36       | ns       | ns       |
| miR-1255a        | 0.09                        | 0.11                        | 0.81       | ns       | ns       |
| miR-125b-5p      | 569.76                      | 1201.99                     | 0.47       | 2.00E-18 | 1.60E-16 |
| miR-1260b        | 0.06                        | 0.03                        | 1.88       | ns       | ns       |
| miR-126-3p       | 5175.46                     | 7403.48                     | 0.7        | 1.10E-08 | 1.90E-07 |
| miR-1268b        | nd                          |                             |            |          |          |
| miR-1280         | nd                          |                             |            |          |          |
| miR-1281         | nd                          |                             |            |          |          |
| miR-1307-3p      | 1757.38                     | 862.08                      | 2.04       | 4.80E-11 | 1.20E-09 |
| miR-130a-3p      | 54.12                       | 119.94                      | 0.45       | 5.20E-19 | 4.50E-17 |
| miR-130b-3p      | 32.41                       | 15.49                       | 2.09       | 0.00012  | 0.00086  |
| miR-140-3p       | 1693.46                     | 1114.73                     | 1.52       | 8.40E-12 | 2.40E-10 |
| miR-143-3p       | 49951.54                    | 60011.86                    | 0.83       | 0.00087  | 0.0053   |
| miR-145-5p       | 1079.12                     | 2310.46                     | 0.47       | 7.20E-16 | 3.60E-14 |
| miR-1469         | 0.01                        | 0.01                        | 1          | ns       | ns       |
| miR-150-5p       | 466.3                       | 749.86                      | 0.62       | 1.60E-06 | 1.80E-05 |
| miR-151a-3p      | 2777.42                     | 1893.57                     | 1.47       | 0.0024   | 0.013    |
| miR-151a-5p      | 163.7                       | 104.19                      | 1.57       | 3.00E-06 | 3.10E-05 |
| miR-155-5p       | 278.49                      | 206.78                      | 1.35       | ns       | ns       |
| miR-1587         | nd                          |                             |            |          |          |
| miR-15a-5p       | 233.93                      | 170.76                      | 1.37       | 0.0011   | 0.0066   |
| miR-15b-5p       | 252.64                      | 186.43                      | 1.36       | ns       | ns       |
| miR-16-5p        | 472.39                      | 583.1                       | 0.81       | 7.00E-05 | 0.00054  |

|             |          |          |      |          |          |
|-------------|----------|----------|------|----------|----------|
| miR-17-5p   | 932.86   | 447.88   | 2.08 | 1.90E-05 | 0.00017  |
| miR-181a-5p | 1109.61  | 807.06   | 1.37 | 0.044    | ns       |
| miR-181b-5p | 239.39   | 136.4    | 1.76 | 0.00091  | 0.0055   |
| miR-1825    | 0.03     | 0.05     | 0.64 | ns       | ns       |
| miR-18a-5p  | 26.51    | 8.51     | 3.12 | 2.50E-05 | 0.00022  |
| miR-1908-5p | 0.03     | 0.04     | 0.88 | ns       | ns       |
| miR-1909-5p | 0.02     | 0.02     | 0.95 | ns       | ns       |
| miR-1910-5p | 0.05     | 0.03     | 1.54 | ns       | ns       |
| miR-191-3p  | 1.47     | 2.62     | 0.56 | 1.70E-06 | 1.80E-05 |
| miR-1915-5p | 0.12     | 0.04     | 2.95 | 0.025    | ns       |
| miR-191-5p  | 614.4    | 704.89   | 0.87 | 0.002    | 0.011    |
| miR-193a-5p | 586.06   | 730.95   | 0.8  | 1.70E-05 | 0.00015  |
| miR-197-3p  | 369.27   | 382.92   | 0.96 | 0.047    | ns       |
| miR-202-5p  | 0.46     | 0.22     | 2.07 | ns       | ns       |
| miR-20a-5p  | 803.78   | 365.63   | 2.2  | 3.70E-07 | 4.60E-06 |
| miR-20b-5p  | 22.5     | 8.99     | 2.5  | 0.026    | ns       |
| miR-2116-3p | 0.63     | 0.67     | 0.94 | 0.56     | 0.78     |
| miR-221-3p  | 143.41   | 56.12    | 2.56 | 1.90E-13 | 6.70E-12 |
| miR-222-3p  | 34.22    | 13.79    | 2.48 | 1.50E-11 | 4.20E-10 |
| miR-223-3p  | 203.87   | 266.41   | 0.77 | 2.50E-07 | 3.20E-06 |
| miR-2277-5p | 0.7      | 0.49     | 1.42 | ns       | ns       |
| miR-23a-3p  | 1547.08  | 1529.14  | 1.01 | ns       | ns       |
| miR-23b-3p  | 1575.05  | 2037.4   | 0.77 | 9.00E-07 | 1.00E-05 |
| miR-25-3p   | 10690.02 | 6366.1   | 1.68 | 7.00E-11 | 1.60E-09 |
| miR-26a-5p  | 2217.95  | 4100.48  | 0.54 | 1.70E-22 | 2.10E-20 |
| miR-27a-3p  | 674.21   | 723.1    | 0.93 | 0.012    | 0.049    |
| miR-2861    | nd       |          |      |          |          |
| miR-29a-3p  | 7378.83  | 12128.88 | 0.61 | 2.30E-12 | 7.30E-11 |
| miR-30a-5p  | 18903.43 | 22251.94 | 0.85 | 0.00014  | 0.001    |
| miR-30d-5p  | 15899.47 | 7954.91  | 2    | 1.50E-08 | 2.60E-07 |
| miR-3121-3p | 0.03     | 0.02     | 1.28 | ns       | ns       |
| miR-3135b   | nd       |          |      |          |          |
| miR-3141    | nd       |          |      |          |          |
| miR-3153    | nd       |          |      |          |          |
| miR-3157-3p | 0.31     | 0.47     | 0.66 | 0.0023   | 0.012    |
| miR-3162-3p | 0.02     | 0.02     | 1.19 | ns       | ns       |
| miR-3162-5p | 0.03     | 0.01     | 2.52 | ns       | ns       |
| miR-3178    | 0.01     | 0.02     | 0.9  | ns       | ns       |
| miR-3196    | 0.03     | 0.02     | 1.28 | ns       | ns       |
| miR-3197    | nd       |          |      |          |          |
| miR-320e    | 0.06     | 0.09     | 0.68 | 0.014    | ns       |
| miR-323b-3p | 9.55     | 4.07     | 2.35 | 0.005    | 0.024    |
| miR-337-3p  | 55.42    | 56.4     | 0.98 | 1.60E-08 | 2.70E-07 |
| miR-342-3p  | 105.08   | 108.99   | 0.96 | 0.05     | ns       |
| miR-3613-3p | 0.73     | 0.94     | 0.78 | 0.021    | ns       |
| miR-3613-5p | 16.25    | 13.89    | 1.17 | ns       | ns       |

|              |         |         |      |          |          |
|--------------|---------|---------|------|----------|----------|
| miR-361-5p   | 347.94  | 271.42  | 1.28 | 0.0048   | 0.023    |
| miR-3619-5p  | 0.04    | 0.03    | 1.6  | ns       | ns       |
| miR-3646     | 0.02    | 0.01    | 1.11 | ns       | ns       |
| miR-3656     | 0.01    | 0.03    | 0.49 | 0.00028  | 0.0019   |
| miR-3663-3p  | 0.02    | 0.01    | 1.69 | ns       | ns       |
| miR-3679-5p  | 0.07    | 0.05    | 1.37 | ns       | ns       |
| miR-371b-5p  | 0.03    | 0.04    | 0.81 | ns       | ns       |
| miR-378a-3p  | 1265.16 | 2268.86 | 0.56 | 7.90E-12 | 2.30E-10 |
| miR-378c     | 18.9    | 38.24   | 0.49 | 1.90E-15 | 8.90E-14 |
| miR-378f     | 0.06    | 0.11    | 0.56 | 0.0005   | 0.0032   |
| miR-378h     | nd      |         |      |          |          |
| miR-378i     | 0.16    | 0.34    | 0.46 | 2.70E-05 | 0.00023  |
| miR-3921     | nd      |         |      |          |          |
| miR-3935     | nd      |         |      |          |          |
| miR-3940-5p  | 0.47    | 0.46    | 1.03 | ns       | ns       |
| miR-3942-3p  | 0.07    | 0.06    | 1.16 | ns       | ns       |
| miR-409-3p   | 39.41   | 19.38   | 2.03 | ns       | ns       |
| miR-423-5p   | 69.46   | 40.23   | 1.73 | 4.00E-12 | 1.20E-10 |
| miR-425-5p   | 208.62  | 116     | 1.8  | 1.30E-05 | 0.00012  |
| miR-4258     | nd      |         |      |          |          |
| miR-4274     | nd      |         |      |          |          |
| miR-4281     | nd      |         |      |          |          |
| miR-4286     | 0.18    | 0.32    | 0.56 | 1.80E-06 | 1.90E-05 |
| miR-4290     | nd      |         |      |          |          |
| miR-4306     | 0.04    | 0.05    | 0.85 | ns       | ns       |
| miR-4310     | nd      |         |      |          |          |
| miR-4429     | nd      |         |      |          |          |
| miR-4430     | 0.02    | 0.04    | 0.5  | 0.0079   | 0.035    |
| miR-4433a-3p | nd      |         |      |          |          |
| miR-4443     | 0.34    | 0.7     | 0.49 | 2.00E-07 | 2.70E-06 |
| miR-4452     | nd      |         |      |          |          |
| miR-4454     | 0.18    | 0.41    | 0.44 | 2.80E-07 | 3.50E-06 |
| miR-4463     | nd      |         |      |          |          |
| miR-4466     | 0.05    | 0.07    | 0.78 | ns       | ns       |
| miR-4481     | nd      |         |      |          |          |
| miR-4487     | 0.02    | 0.03    | 0.8  | ns       | ns       |
| miR-4488     | 0.03    | 0.05    | 0.56 | 0.0083   | 0.037    |
| miR-4492     | nd      |         |      |          |          |
| miR-4497     | nd      |         |      |          |          |
| miR-4505     | 0.03    | 0.05    | 0.56 | 0.015    | 0.061    |
| miR-4507     | nd      |         |      |          |          |
| miR-450b-5p  | 13.85   | 27.69   | 0.5  | 7.30E-17 | 4.50E-15 |
| miR-451-3p   | 886.23  | 1900.63 | 0.47 | 1.00E-16 | 5.70E-15 |
| miR-4514     | nd      |         |      |          |          |
| miR-4516     | 0.02    | 0.01    | 1.79 | ns       | ns       |
| miR-4529-3p  | 0.06    | 0.08    | 0.81 | ns       | ns       |

|              |         |         |      |          |          |
|--------------|---------|---------|------|----------|----------|
| miR-4530     | nd      |         |      |          |          |
| miR-4532     | 0.01    | 0.01    | 0.86 | ns       | ns       |
| miR-4539     | 0.01    | 0.01    | 1.03 | ns       | ns       |
| miR-455-3p   | 756.52  | 1541.15 | 0.49 | 1.40E-16 | 7.70E-15 |
| miR-4646-3p  | 0.04    | 0.06    | 0.68 | ns       | ns       |
| miR-4652-3p  | nd      |         |      |          |          |
| miR-4668-5p  | nd      |         |      |          |          |
| miR-4674     | 0.16    | 0.13    | 1.17 | ns       | ns       |
| miR-4690-5p  | 0.04    | 0.05    | 0.82 | ns       | ns       |
| miR-4701-5p  | 0.04    | 0.03    | 1.46 | ns       | ns       |
| miR-4706     | 0.02    | 0.01    | 1.7  | ns       | ns       |
| miR-4707-5p  | 0.09    | 0.07    | 1.41 | ns       | ns       |
| miR-4708-5p  | 0.01    | 0.01    | 1.12 | ns       | ns       |
| miR-4722-3p  | 0.01    | 0.01    | 1.11 | ns       | ns       |
| miR-4725-5p  | 0.04    | 0.02    | 1.86 | ns       | ns       |
| miR-4741     | 0.19    | 0.08    | 2.36 | 0.014    | ns       |
| miR-4745-5p  | 0.07    | 0.03    | 2.1  | ns       | ns       |
| miR-4763-3p  | nd      |         |      |          |          |
| miR-4789-5p  | nd      |         |      |          |          |
| miR-4793-3p  | 0.05    | 0.02    | 2.79 | 0.028    | ns       |
| miR-4800-3p  | 0.09    | 0.36    | 0.24 | 2.50E-14 | 9.90E-13 |
| miR-486-3p   | 0.42    | 0.82    | 0.52 | 1.30E-08 | 2.30E-07 |
| miR-486-5p   | 203.92  | 336.09  | 0.61 | 5.10E-14 | 1.90E-12 |
| miR-491-5p   | 1.45    | 1.64    | 0.89 | 0.016    | ns       |
| miR-502-3p   | 14.26   | 8.15    | 1.75 | 4.00E-08 | 6.30E-07 |
| miR-503-5p   | 11.44   | 8.57    | 1.33 | ns       | ns       |
| miR-532-5p   | 1621.16 | 702.65  | 2.31 | 4.10E-16 | 2.10E-14 |
| miR-548a-3p  | nd      |         |      |          |          |
| miR-548ac    | nd      |         |      |          |          |
| miR-548ae-3p | nd      |         |      |          |          |
| miR-548u     | nd      |         |      |          |          |
| miR-550a-3p  | 2.33    | 1.93    | 1.21 | 0.76     | 0.82     |
| miR-559      | nd      |         |      |          |          |
| miR-563      | nd      |         |      |          |          |
| miR-570-3p   | 1.27    | 1.11    | 1.14 | ns       | ns       |
| miR-574-3p   | 135.05  | 209.16  | 0.65 | 1.70E-11 | 4.70E-10 |
| miR-574-5p   | nd      |         |      |          |          |
| miR-584-5p   | 53.68   | 45.03   | 1.19 | ns       | ns       |
| miR-602      | nd      |         |      |          |          |
| miR-629-3p   | 2.92    | 2.62    | 1.11 | ns       | ns       |
| miR-635      | nd      |         |      |          |          |
| miR-638      | nd      |         |      |          |          |
| miR-663a     | nd      |         |      |          |          |
| miR-664a-5p  | 5.26    | 4.66    | 1.13 | ns       | ns       |
| miR-762      | nd      |         |      |          |          |
| miR-877-3p   | 0.17    | 0.12    | 1.45 | ns       | ns       |

|            |          |          |      |          |          |
|------------|----------|----------|------|----------|----------|
| miR-885-3p | 4.99     | 5.49     | 0.91 | 0.0019   | 0.011    |
| miR-885-5p | 407.2    | 467.06   | 0.87 | 0.0016   | 0.0088   |
| miR-92a-3p | 23597.42 | 16906.15 | 1.4  | ns       | ns       |
| miR-92b-3p | 20.41    | 10.8     | 1.89 | ns       | ns       |
| miR-933    | 0.02     | 0.02     | 1.24 | ns       | ns       |
| miR-93-5p  | 6759.66  | 2313.62  | 2.92 | 6.80E-26 | 1.50E-23 |
| miR-940    | 0.4      | 0.74     | 0.55 | 5.60E-07 | 6.60E-06 |
| miR-940    | 1.89     | 1.2      | 1.58 | ns       | ns       |

SUPPLEMENTARY FIGURES

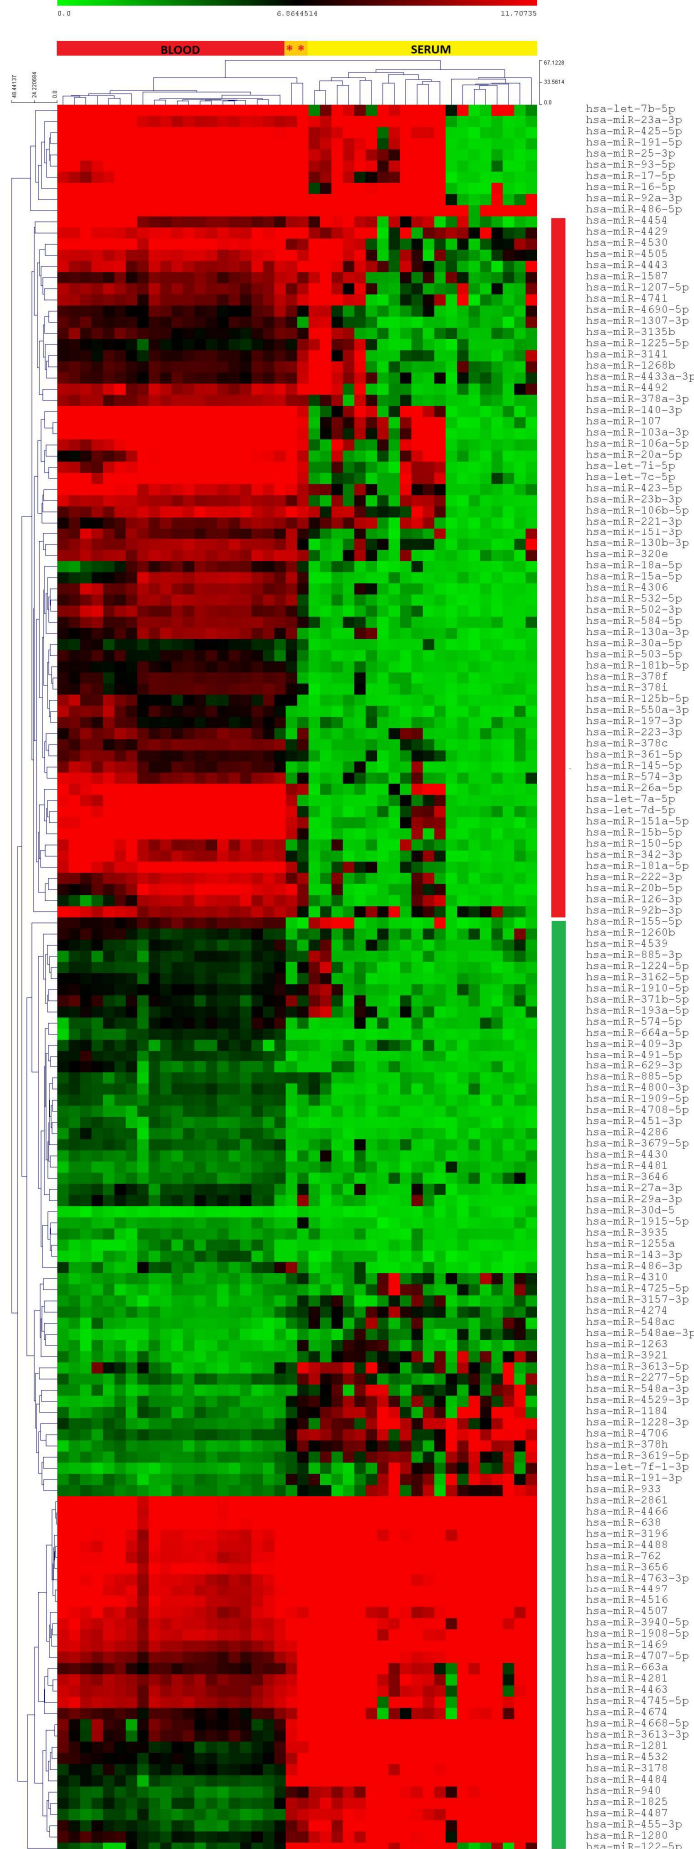

**Figure S1.** Heatmap with the pseudocolor scale underneath, of the differentially expressed miRNAs between serum and blood. The heatmap includes two haemolyzed serum samples (Hb 63.54 and 379 mg/mL), marked with red asterisks. Unsupervised hierarchical clustering is used to order samples and miRNAs, the log2-transformed microarray signal was considered. The sample tree with optimized leaf-ordering is drawn using Euclidean distances and average linkages for cluster-to-cluster distance. The red cluster evidenced the miRNAs influenced by hemolysis, the green cluster the unaffected ones.

## Expression of miRNAs in different Human tissues

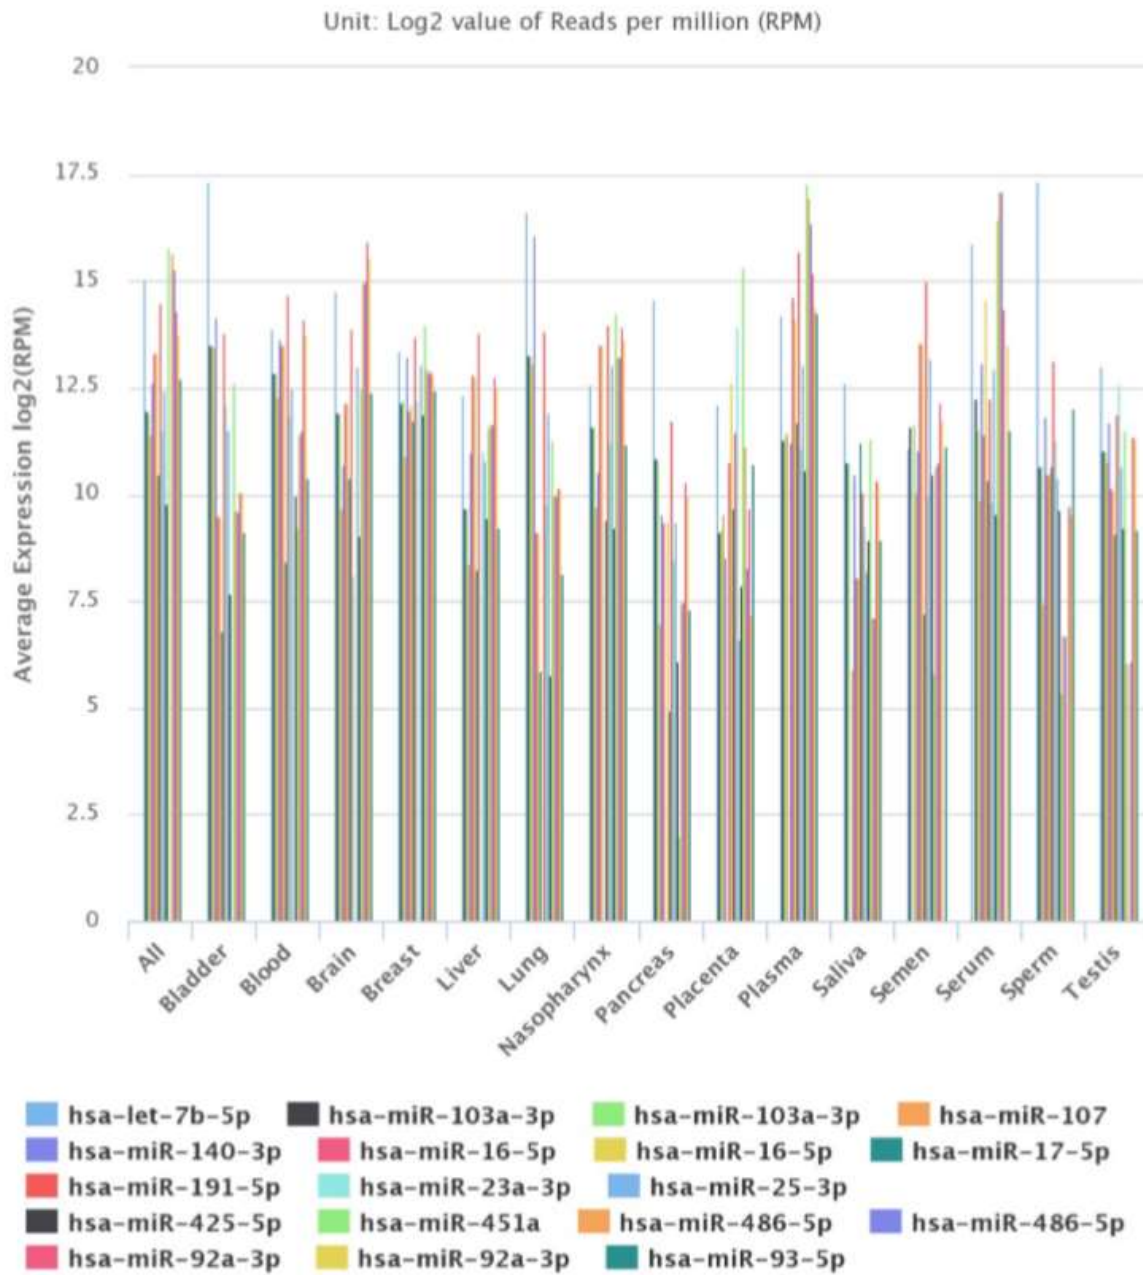

**Figure S2.** MiRNAs from cluster 1 are widely expressed among different human tissues at high levels. Source: <http://guanlab.cmb.med.umich.edu/mirmine/>



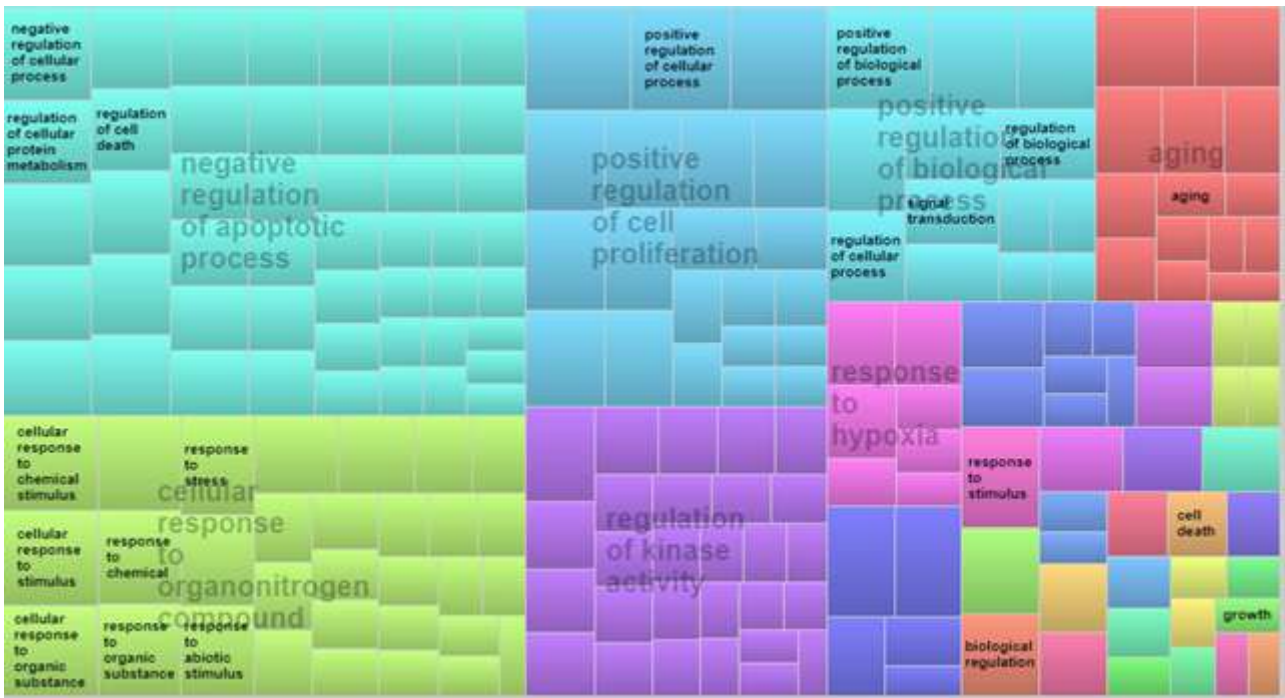

**Figure S3.** GO enriched terms treeMap of the 433 validated target miRNAs from cluster 1. The size of the rectangles is proportional to the adjusted p-value of the enriched GO term relative to the background list.

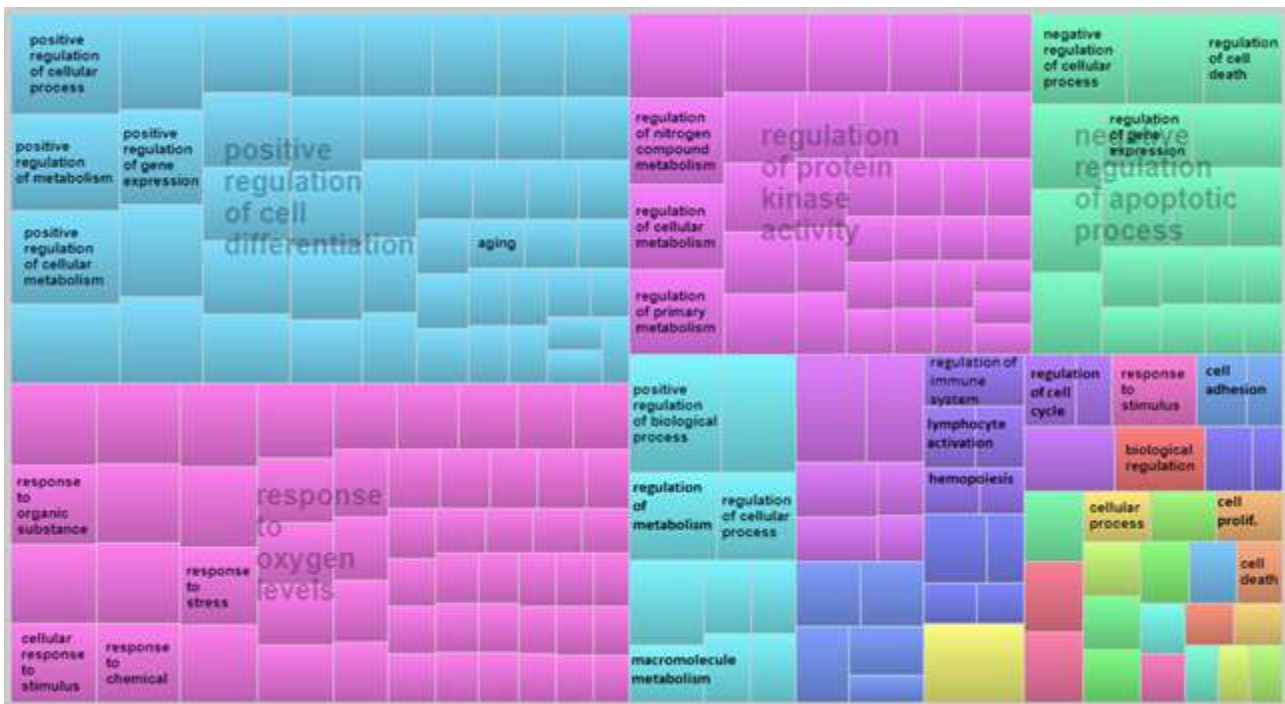

**Figure S4.** GO enriched terms treeMap of the validated target miRNAs from cluster 2. The size of the rectangles is proportional to the adjusted p-value of the enriched GO term relative to the background list.

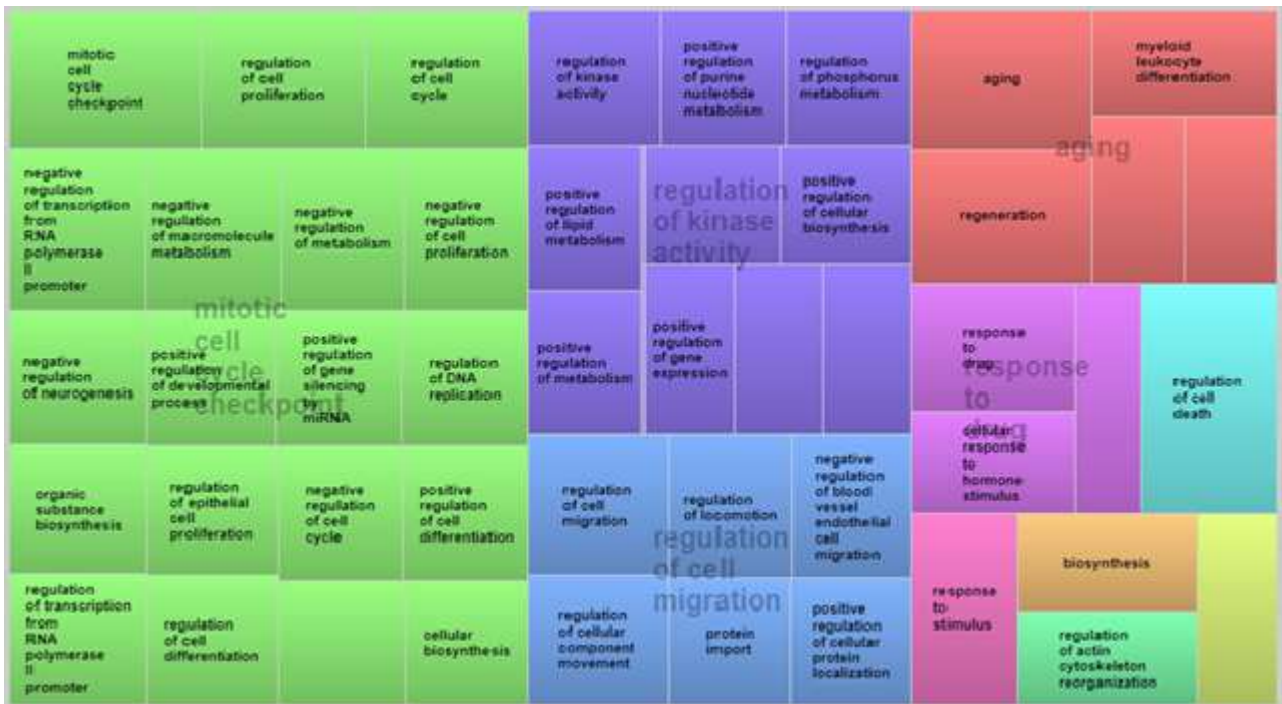

**Figure S5.** GO enriched terms treeMap of the validated target miRNAs from cluster 5. The size of the rectangles is proportional to the adjusted p-value of the enriched GO term relative to the background list.

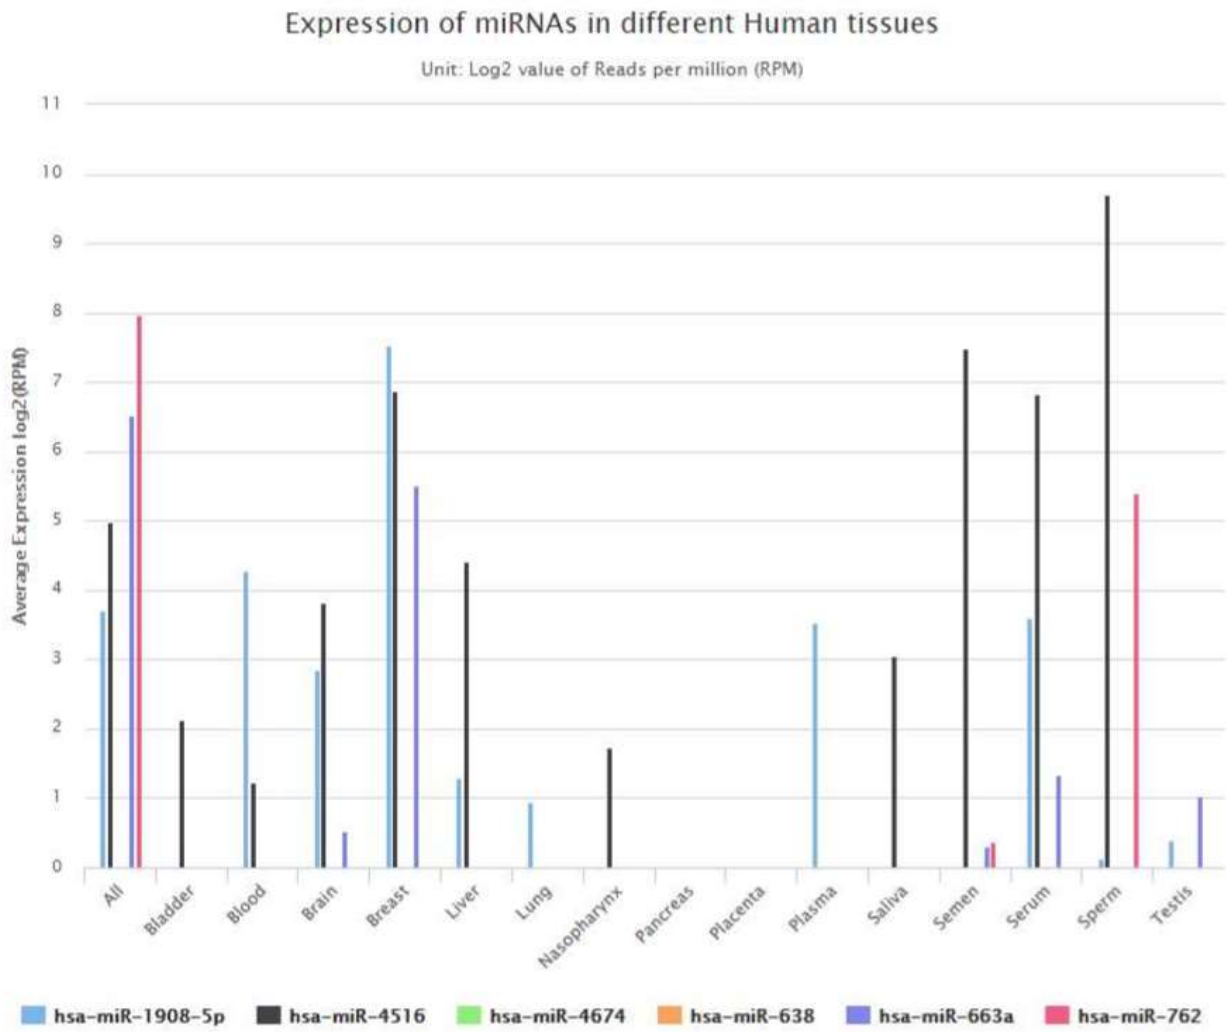

**Figure S6.** Limited information exist about the expression profiles of the miRNAs from cluster 5. Source: <http://guanlab.cmb.med.umich.edu/mirmine/>

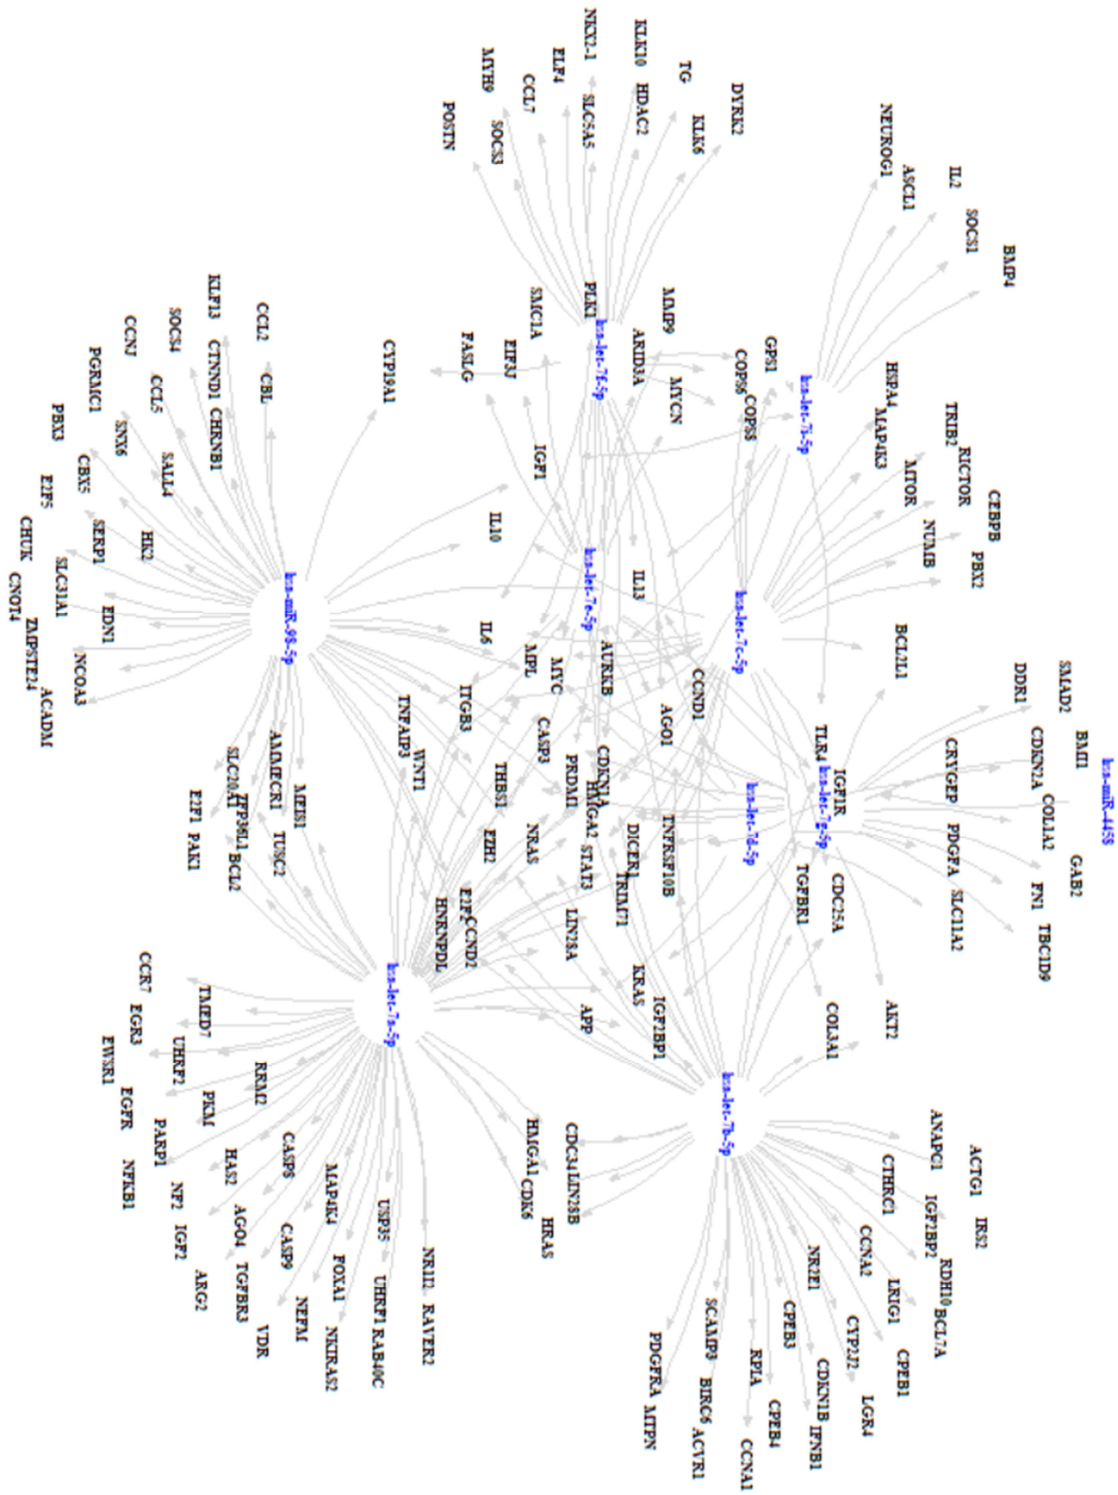

**Figure S7.** Let7 family validated target network built with Tidyverse (version 1.2.1) and Igraph (version 1.1.2) packages in R environment. Validated targets were downloaded from miRTarBase. Targets with strong experimental evidences were considered.

## Expression of miRNAs in different Human tissues

Unit: Log2 value of Reads per million (RPM)

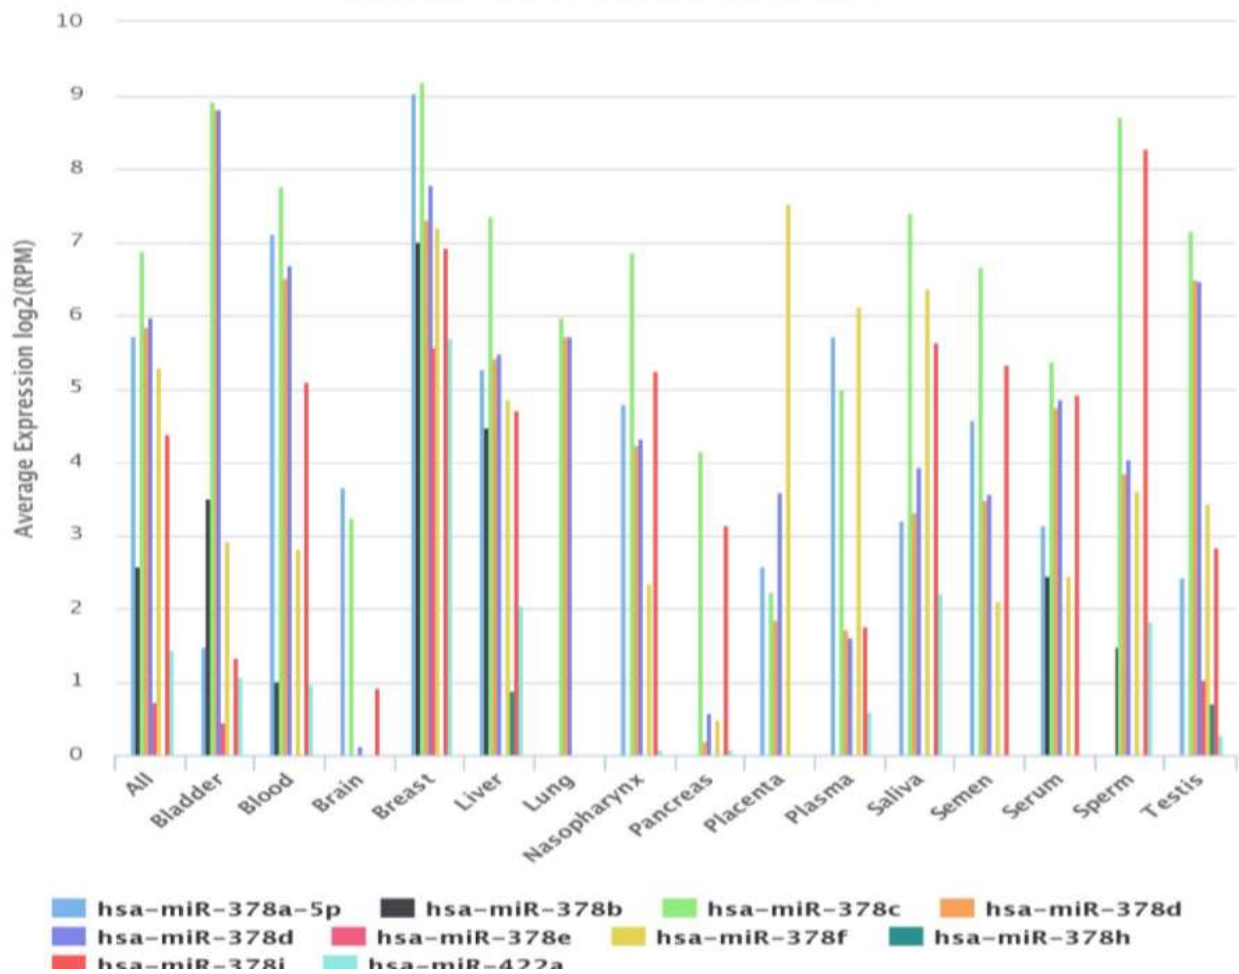

**Figure S8.** Mir-378 family expression pattern in different tissues. Mir-378h was detected in liver and testis only. Source: <http://guanlab.cmb.med.umich.edu/mirmine/>
